# Supplementary material for: From Vietnamese plants to a biflavonoid that relieves inflammation by triggering the lipid mediator class switch to resolution
Source: PubMed Central journal article supplement — Acta Pharm Sin B. 2021 Apr 20;11(6):1629–47. doi: 10.1016/j.apsb.2021.04.011 (PMC8245855; doi:10.1016/j.apsb.2021.04.011), 2021-04-20
Supplement: mmc1.pdf [file mmc1.pdf]

## Supporting Information for

### Original article

## From Vietnamese plants to a biflavonoid that relieves inflammation by triggering the lipid mediator class switch to resolution

Tran Thi Van Anh<sup>b,a,†</sup>, Alilou Mostafa<sup>a,†</sup>, Zhigang Rao<sup>c,†</sup>, Simona Pace<sup>d</sup>, Stefan Schwaiger<sup>a</sup>, Christian Kretzer<sup>d</sup>, Veronika Temml<sup>a</sup>, Carsten Giesel<sup>d</sup>, Paul M. Jordan<sup>d</sup>, Rossella Bilancia<sup>e</sup>, Christina Weinigel<sup>f</sup>, Silke Rummler<sup>f</sup>, Birgit Waltenberger<sup>a</sup>, Tran Hung<sup>b</sup>, Antonietta Rossi<sup>e</sup>, Hermann Stuppner<sup>a</sup>, Oliver Werz<sup>d,\*</sup>, Andreas Koeberle<sup>c,d,\*</sup>

<sup>a</sup>*Institute of Pharmacy/Pharmacognosy and Center for Molecular Biosciences Innsbruck (CMBI), University of Innsbruck, Innsbruck 6020, Austria*

<sup>b</sup>*Faculty of Pharmacy, University of Medicine and Pharmacy at Ho Chi Minh City, Ho Chi Minh City 700000, Vietnam*

<sup>c</sup>*Michael Popp Institute and Center for Molecular Biosciences Innsbruck (CMBI), University of Innsbruck, Innsbruck 6020, Austria*

<sup>d</sup>*Department of Pharmaceutical/Medicinal Chemistry, Institute of Pharmacy, Friedrich Schiller University Jena, Jena 07743, Germany*

<sup>e</sup>*Department of Pharmacy, School of Medicine, University of Naples Federico II, Naples 80131, Italy*

<sup>f</sup>*Institute of Transfusion Medicine, University Hospital Jena, Jena 07747, Germany*

<sup>†</sup>These authors made equal contributions to this work.

Received 4 March 2021; received in revised form 7 April 2021; accepted 7 April 2021

\*Corresponding authors. Tel.: +49 3641 949801 (Oliver Werz), +43 512 507 57903 (Andreas Koeberle); fax: +49 3641 949802 (Oliver Werz).

E-mail addresses: [oliver.werz@uni-jena.de](mailto:oliver.werz@uni-jena.de) (Oliver Werz), [andreas.koeberle@uibk.ac.at](mailto:andreas.koeberle@uibk.ac.at) (Andreas Koeberle).

## S1. Chiral HPLC-analysis of compounds 1 to 11

Chiral HPLC analysis of compound **1** ( $[\alpha]_D^{20} +4.1$  (c 0.2, MeOH))

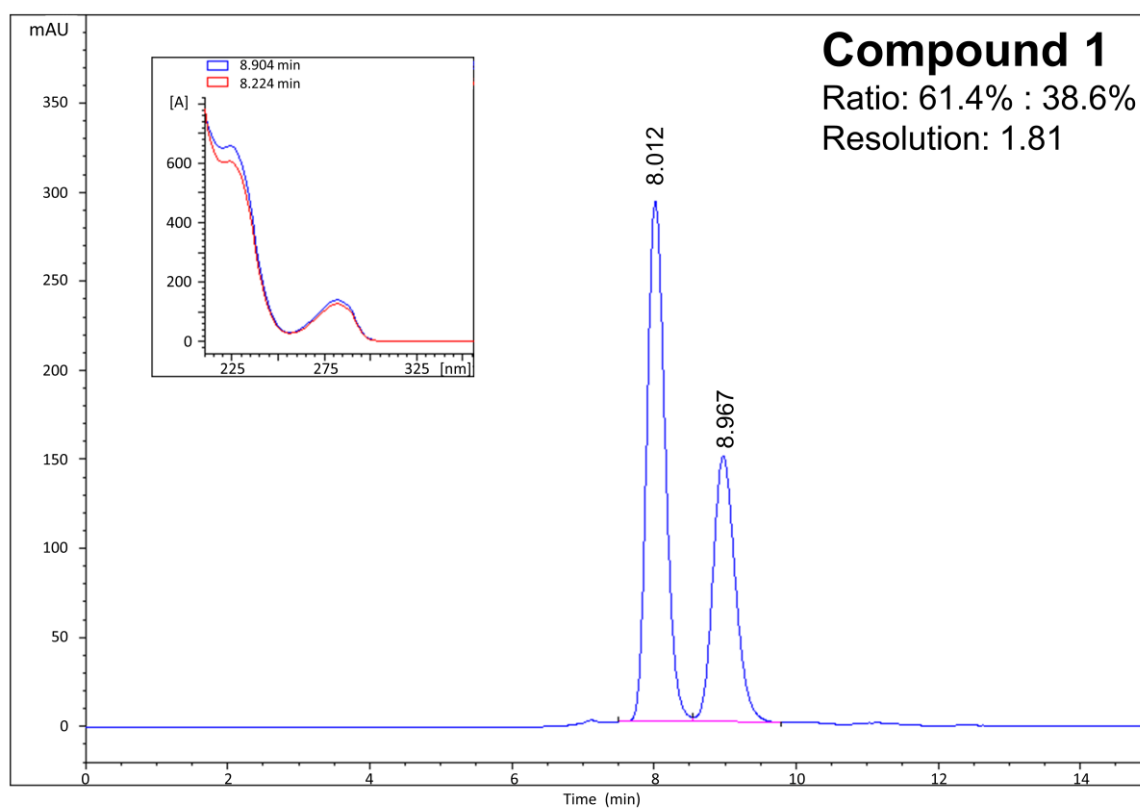

Analytical conditions: Phenomenex Lux 3  $\mu\text{m}$  Cellulose-1250 mm  $\times$  4.6 mm, *n*-hexane+isopropanol with 0.1% TFA, 50+50 (v/v); 0.5 mL/min, 20  $^{\circ}\text{C}$ , injection volume: 5  $\mu\text{L}$ ; sample concentration: 0.95 mg/mL *n*-hexane+isopropanol (1+1); 280 nm; insert: online-UV-spectra.

Chiral HPLC analysis of compound **2** ( $[\alpha]_D^{20} -3.0$  ( $c$  0.1, MeOH))

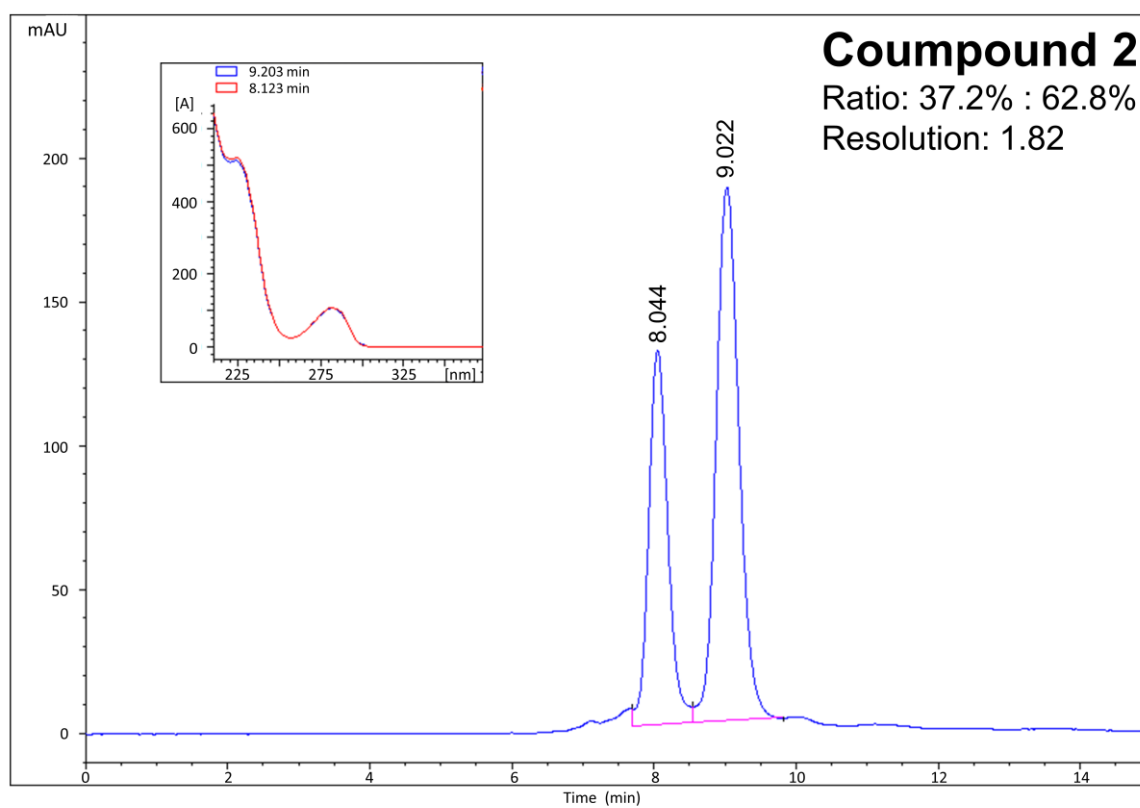

Analytical conditions: Phenomenex Lux 3  $\mu$ m Cellulose-1250 mm  $\times$  4.6 mm, *n*-hexane+isopropanol with 0.1% TFA, 50+50 (*v/v*); 0.5 mL/min, 20  $^{\circ}$ C, injection volume: 5  $\mu$ L; sample concentration: 0.90 mg/mL *n*-hexane+isopropanol (1+1); 280 nm; insert: online-UV-spectra.

Chiral HPLC analysis of compound **3** ( $[\alpha]_D^{20} +12.7$  (c 0.19, MeOH))

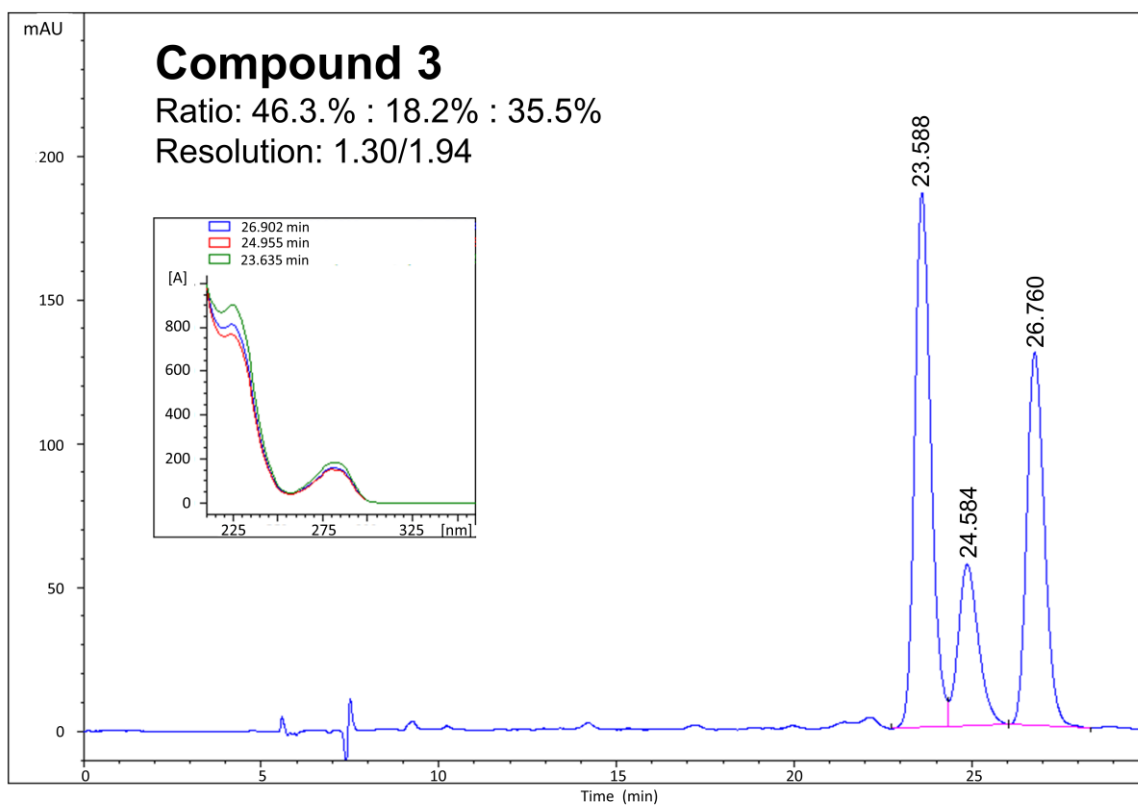

Analytical conditions: Phenomenex Lux 3  $\mu\text{m}$  i-Amylose-3250 mm  $\times$  4.6 mm, *n*-hexane+ethanol with 0.1% TFA, 80+20 (v/v); 0.5 mL/min, 20  $^{\circ}\text{C}$ , injection volume: 5  $\mu\text{L}$ ; sample concentration: 0.85 mg/mL *n*-hexane+isopropanol (1+1); 280 nm; insert: online-UV-spectra.

Chiral HPLC analysis of compound **4** ( $[\alpha]_D^{20} -3.4$  (c 0.23, MeOH))

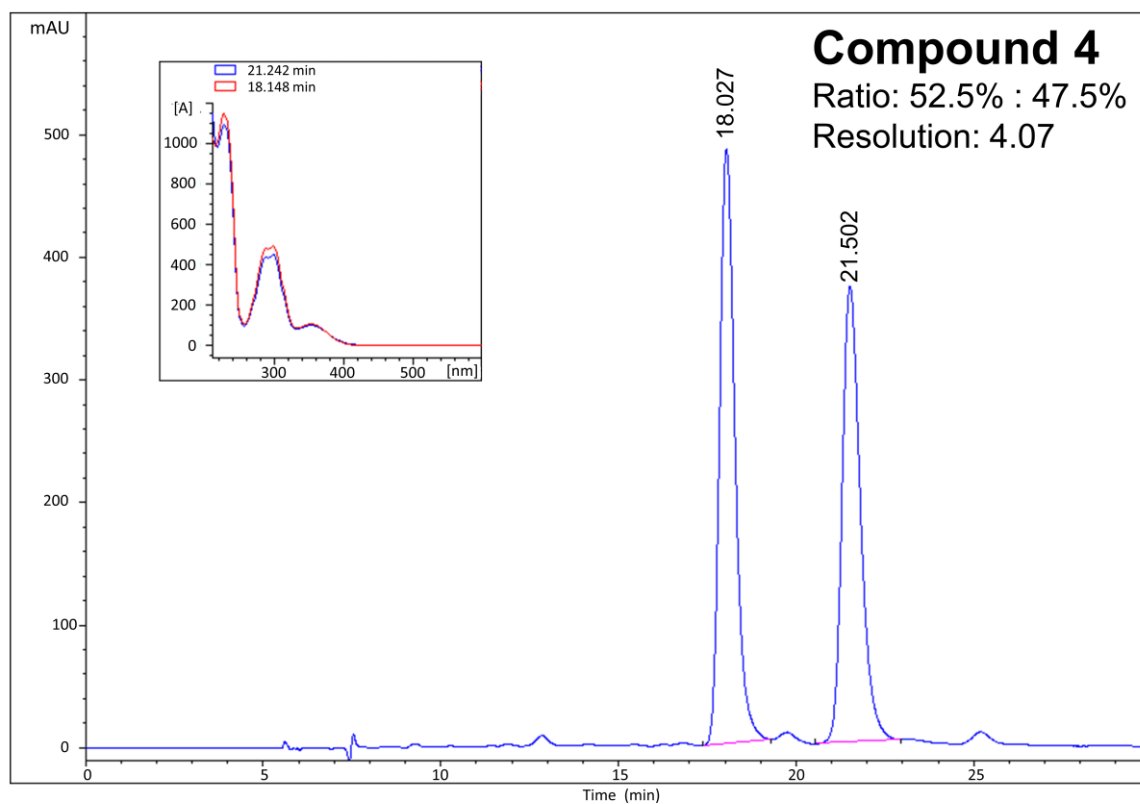

Analytical conditions: Phenomenex Lux 3  $\mu\text{m}$  i-Amylose-3250 mm $\times$  4.6 mm, *n*-hexane+ethanol with 0.1% TFA, 80+20 (v/v); 0.5 mL/min, 20  $^{\circ}\text{C}$ , injection volume: 5  $\mu\text{L}$ ; sample concentration: 1.27 mg/mL *n*-hexane+isopropanol (1+1); 280 nm; insert: online-UV-spectra.

Chiral HPLC analysis of compound **5** ( $[\alpha]_D^{20} +12.4$  ( $c$  0.24, MeOH))

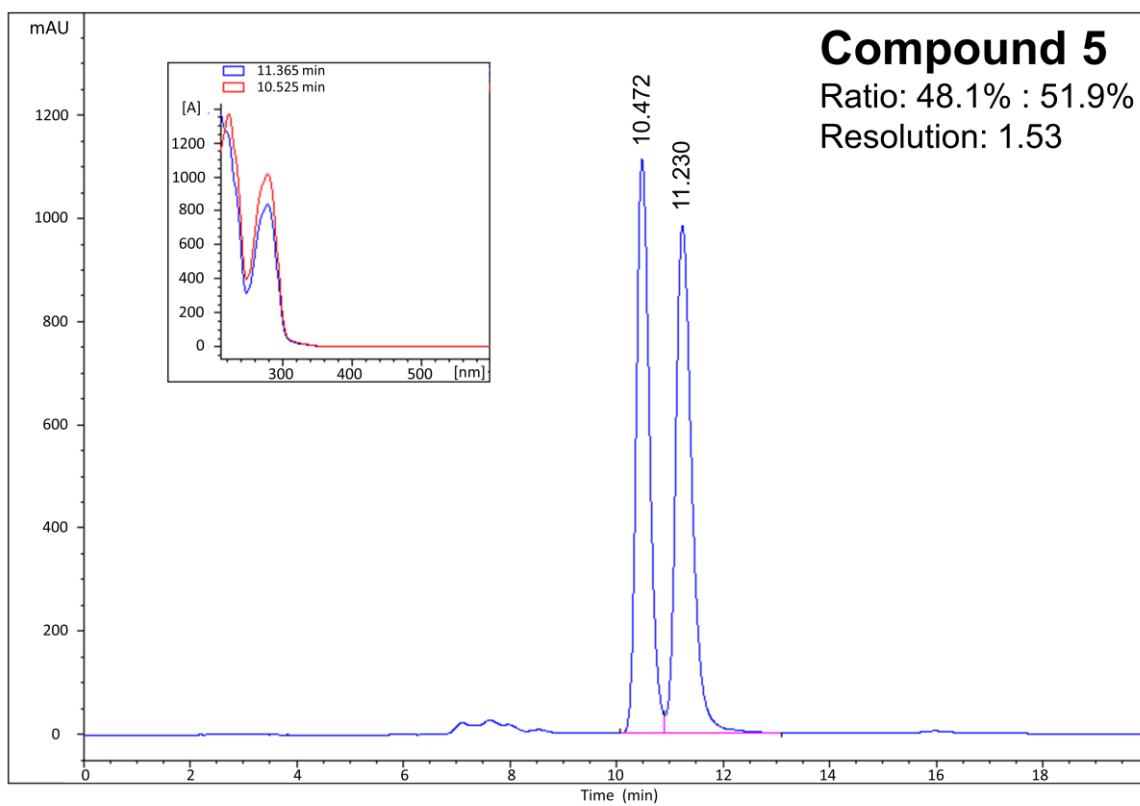

Analytical conditions: Phenomenex Lux 3  $\mu$ m i-Amylose-3250 mm $\times$  4.6 mm, *n*-hexane+isopropanol with 0.1% TFA, 60+40 (*v/v*); 0.5 mL/min, 20  $^{\circ}$ C, injection volume: 5  $\mu$ L; sample concentration: 1.14 mg/mL *n*-hexane+isopropanol (1+1); 280 nm; insert: online-UV-spectra.

Chiral HPLC analysis of compound **6** ( $[\alpha]_D^{20}$  0 (*c* 0.25, MeOH))

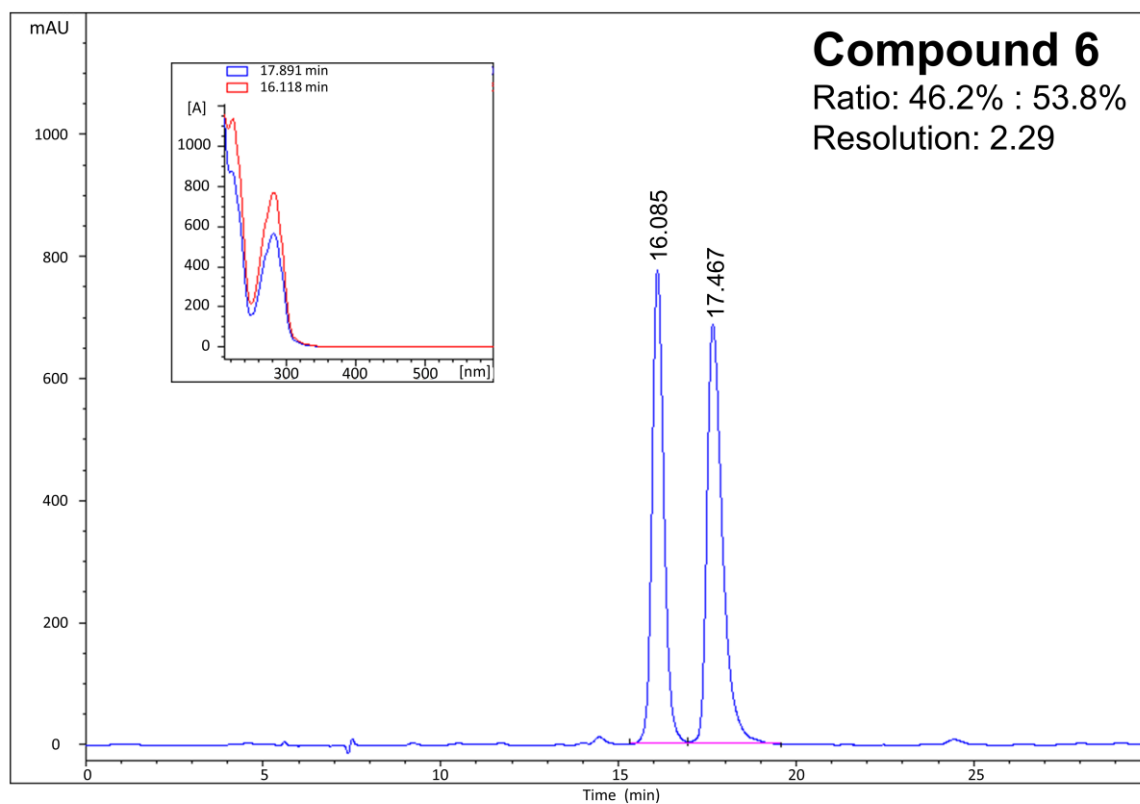

Analytical conditions: Phenomenex Lux 3  $\mu$ m i-Amylose-3250 mm  $\times$  4.6 mm, *n*-hexane+ethanol with 0.1% TFA, 80+20 (v/v); 0.5 mL/min, 20  $^{\circ}$ C, injection volume: 5  $\mu$ L; sample concentration: 1.17 mg/mL *n*-hexane+isopropanol (1+1); 280 nm; insert: online-UV-spectra.

Chiral HPLC analysis of compound **7** ( $[\alpha]_D^{20} +7.7$  ( $c$  0.3, MeOH))

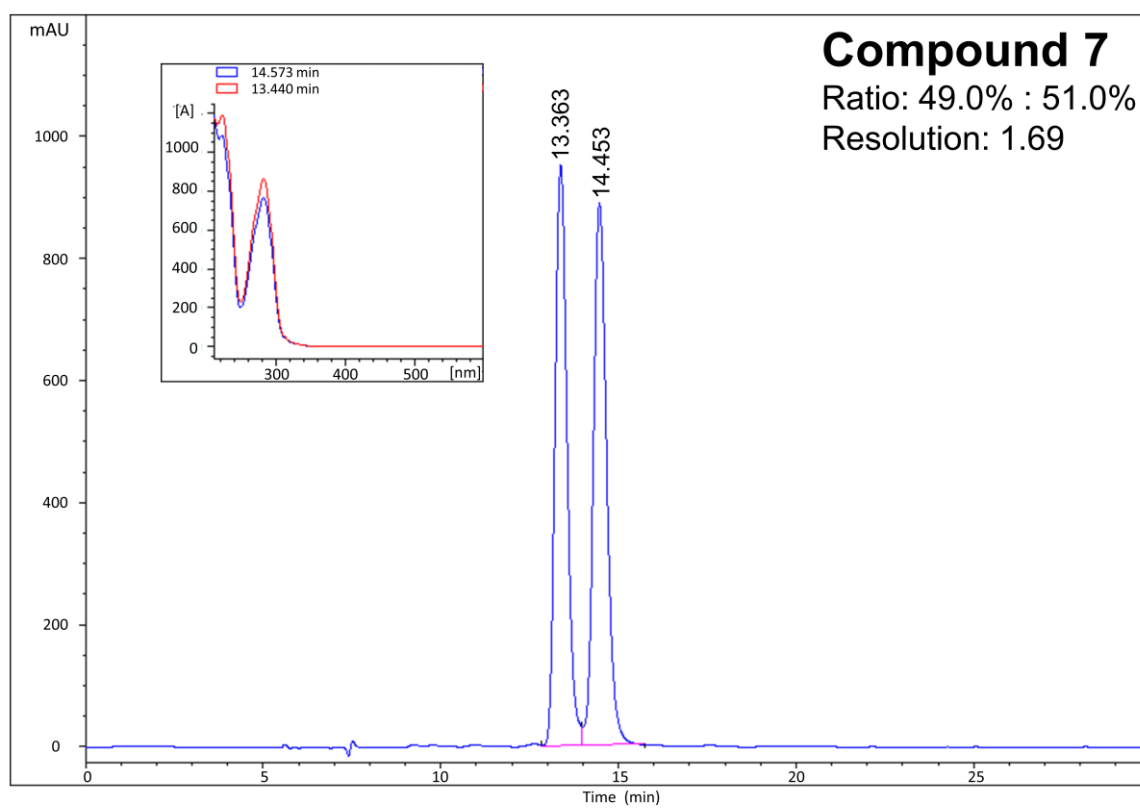

Analytical conditions: Phenomenex Lux 3  $\mu$ m i-Amylose-3250 mm  $\times$  4.6 mm, *n*-hexane+ethanol with 0.1% TFA, 80+20 (v/v); 0.5 mL/min, 20  $^{\circ}$ C, injection volume: 5  $\mu$ L; sample concentration: 1.27 mg/mL *n*-hexane+isopropanol (1+1); 280 nm; insert: online-UV-spectra.



Chiral HPLC analysis of compound **8** ( $[\alpha]_D^{20} +6.8$  ( $c$  0.68, MeOH))

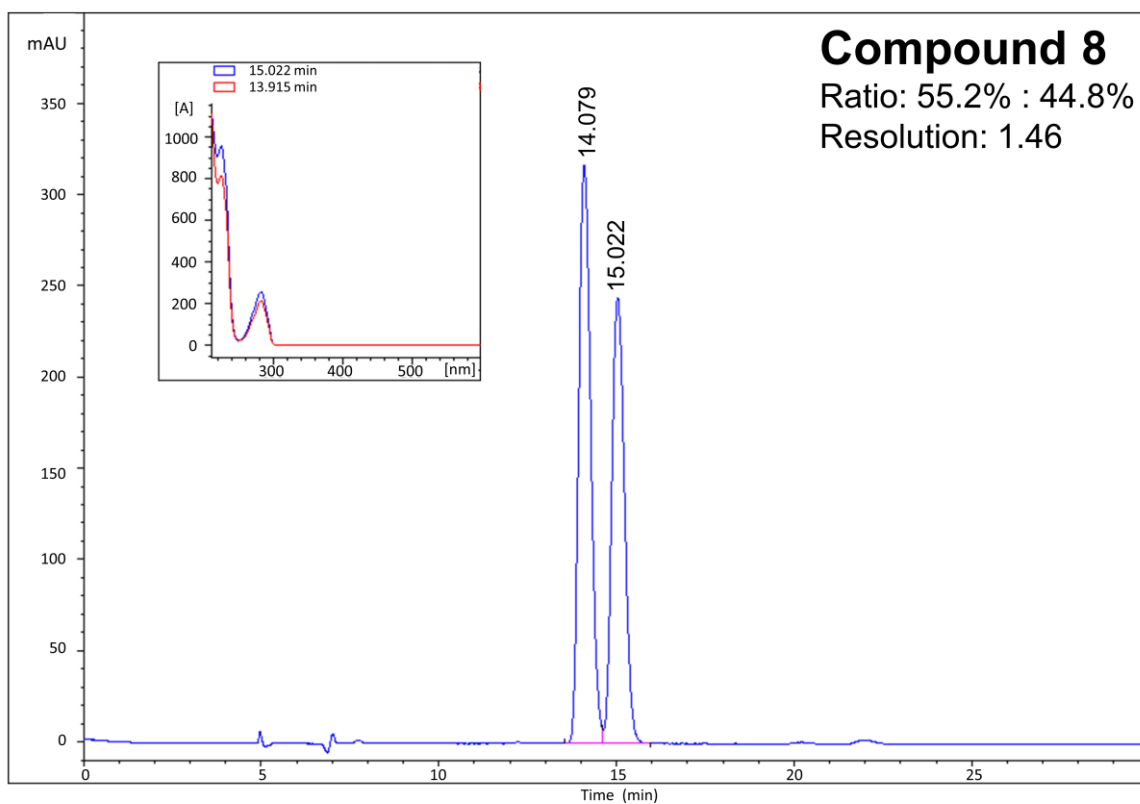

Analytical conditions: Phenomenex Lux 3  $\mu$ m Cellulose-1250 mm $\times$  4.6 mm, *n*-hexane+ethanol with 0.1% TFA, 80+20 (v/v); 0.5 mL/min, 20  $^{\circ}$ C, injection volume: 5  $\mu$ L; sample concentration: 1.06 mg/mL *n*-hexane+isopropanol (1+1); 280 nm; insert: online-UV-spectra.

Chiral HPLC analysis of compound **9** ( $[\alpha]_D^{20} -2.9$  ( $c$  0.35, MeOH))

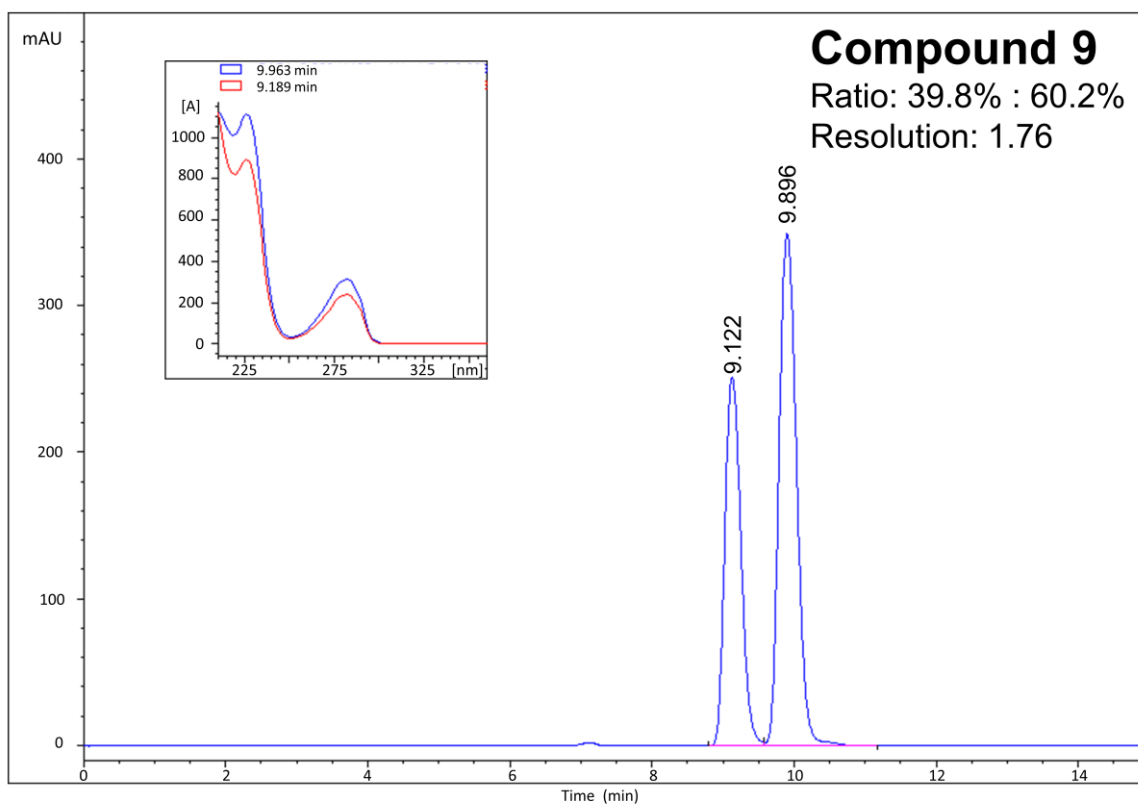

Analytical conditions: Phenomenex Lux 3  $\mu$ m Cellulose-1250 mm  $\times$  4.6 mm, *n*-hexane+isopropanol with 0.1% TFA, 50+50 (*v/v*); 0.5 mL/min, 20  $^{\circ}$ C, injection volume: 5  $\mu$ L; sample concentration: 0.84 mg/mL *n*-hexane+isopropanol (1+1); 280 nm; insert: online-UV-spectra.

Chiral HPLC analysis of compound **10** ( $[\alpha]_D^{20} -30.3$  ( $c$  0.41, MeOH))

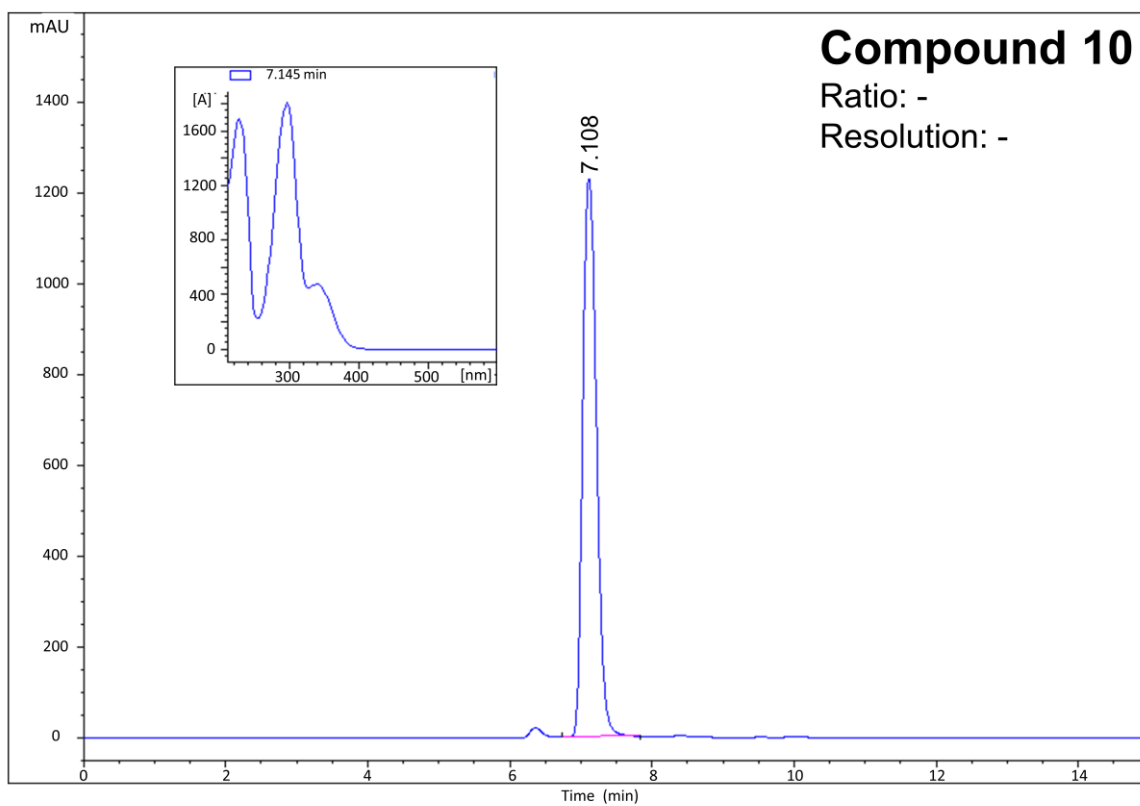

Analytical conditions: Phenomenex Lux 3  $\mu$ m Cellulose-1250 mm  $\times$  4.6 mm, *n*-hexane+isopropanol with 0.1% TFA, 50+50 (*v/v*); 0.5 mL/min, 20  $^{\circ}$ C, injection volume: 5  $\mu$ L; sample concentration: 0.87 mg/mL *n*-hexane+isopropanol (1+1); 280 nm; insert: online-UV-spectrum.

Chiral HPLC analysis of compound **11** ( $[\alpha]_D^{20} -2.2$  (c 0.51, MeOH))

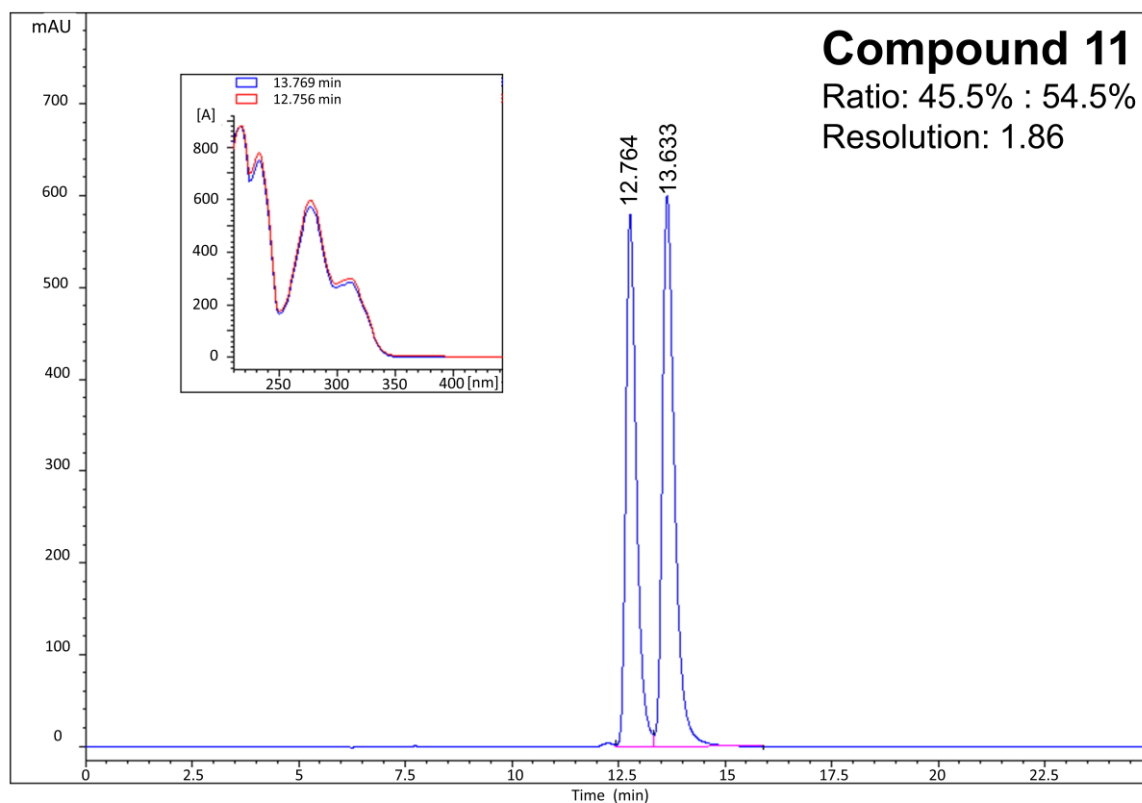

Analytical conditions: Phenomenex Lux 3  $\mu\text{m}$  i-Amylose-3250 mm  $\times$  4.6 mm, *n*-hexane+isopropanol with 0.1% TFA, 80+20 (v/v); 0.5 mL/min, 20  $^{\circ}\text{C}$ , injection volume: 2  $\mu\text{L}$ ; sample concentration: 0.98 mg/mL *n*-hexane+isopropanol (1+1); 280 nm; insert: online-UV-spectra.

## S2. Structure elucidation of the new compound 3

Compound **3** was obtained as a red amorphous powder. The HR-ESI-MS spectra showed a  $[M+NH_4]^+$  ion at  $m/z$  544.2690 (calculated for  $C_{33}H_{38}NO_6^+$   $[M+NH_4]^+$ ,  $m/z$  544.2694), corresponding to a molecular formula of  $C_{33}H_{34}O_6$ .

The  $^1H$  NMR spectrum of **3** showed proton signals of two *p*-substituted phenyl rings [ $\delta_H$  7.22 and 6.76 (both 2H, d, 8.6 Hz) and  $\delta_H$  7.16 and 6.78 (both 2H, d, 8.6 Hz)], three aromatic proton signals of an ABX-system [ $\delta_H$  6.36 (1H, d, 2.3 Hz), 6.25 (1H, dd, 2.3, 8.0 Hz), 6.81 (1H, d, 8.0 Hz)], one aromatic singlet [ $\delta_H$  6.72 (1H, s)], signals of four methylene groups [ $\delta_H$  2.07 (1H, m) and 1.89 (1H, m); 2.84 (1H, m) and 2.62 (1H, m); 2.09 (2H, m); and 2.44 (2H, m)], one methine proton signal [ $\delta_H$  4.26 (1H, t, 7.6 Hz)], one methyl singlet [ $\delta_H$  2.03 (3H, s)], and signals of two methoxy groups [ $\delta_H$  3.72 (3H, s) and 3.74 (3H, s)], and one oxymethine proton signal [ $\delta_H$  4.87 (1H, m)].

The  $^{13}C$ -NMR spectrum and HSQC data of **3** revealed 29 signals with characteristic signals for 12 quaternary aromatic carbons with 6 carbons bearing oxygen, 14 tertiary carbons with 12 aromatic carbons, 4 methylene carbons, two identical methoxy carbons ( $\delta_c$  55.7) and one methyl carbon ( $\delta_c$  9.1). A typical oxymethine proton of the flavan skeleton at 4.87 (1H, m, H-2) and characteristic aliphatic protons at  $\delta_H$  2.07/1.89 and  $\delta_H$  2.84/2.62 indicated a biflavonoid structure consisting of a flavan and a deoxytetrahydrochalcone moiety.

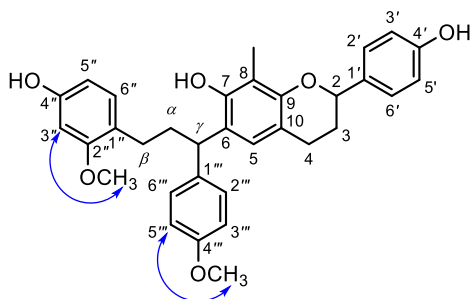

Structure of compound **3** with key NOESY-correlations

The  $^1H$  and  $^{13}C$  spectrum of **3** resembles those of compounds **1** and **2**, except for the exchange of a hydroxy group by a methoxy group in compound **3**. The HMBC correlation between the methoxy group at  $\delta_H$  3.74 and the carbon resonance at  $\delta_c$  159.1 (C-4''') indicated the position of the additional methoxy group at C-4''', which was further verified by the NOESY contact of the methoxy protons with H-3'''/5'''. Thus, compound **3** was identified as the new natural product 6-(3-(4-hydroxy-2-methoxyphenyl)-1-(4-methoxyphenyl)propyl)-2-(4-hydroxyphenyl)-8-methylchroman-7-ol. Interestingly, the 1D-NMR spectra of compound **3** showed for some signals a signal doubling mainly for protons/carbons (H-2, H-5, H-2'/6', -OCH<sub>3</sub> at C-2'', H-5'', and H-6''; C-2, C-4, C-5, C-6, C-7, C- $\alpha$ , C- $\gamma$ , C-1''', and C-3'''/5''') accompanying the stereo centers (C-2 and C- $\gamma$ ) of the compound, suggesting the presence of isomers

and/or rotamers. The chiral HPLC analysis of compound **3** revealed the presence of at least three of the four possible isomers of the compound (Section 1) and confirmed thereby this assumption.

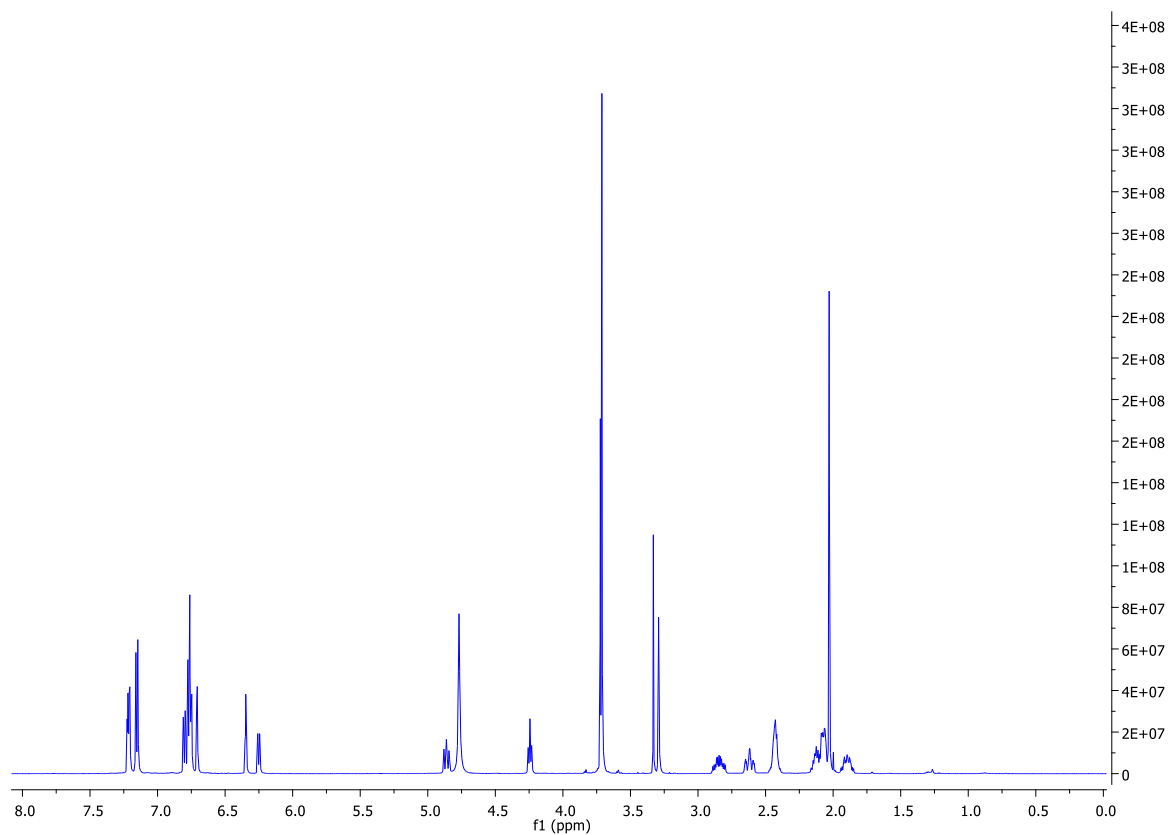

<sup>1</sup>H-NMR spectrum (600.19 MHz, methanol-*d*<sub>4</sub>) of compound **3**.

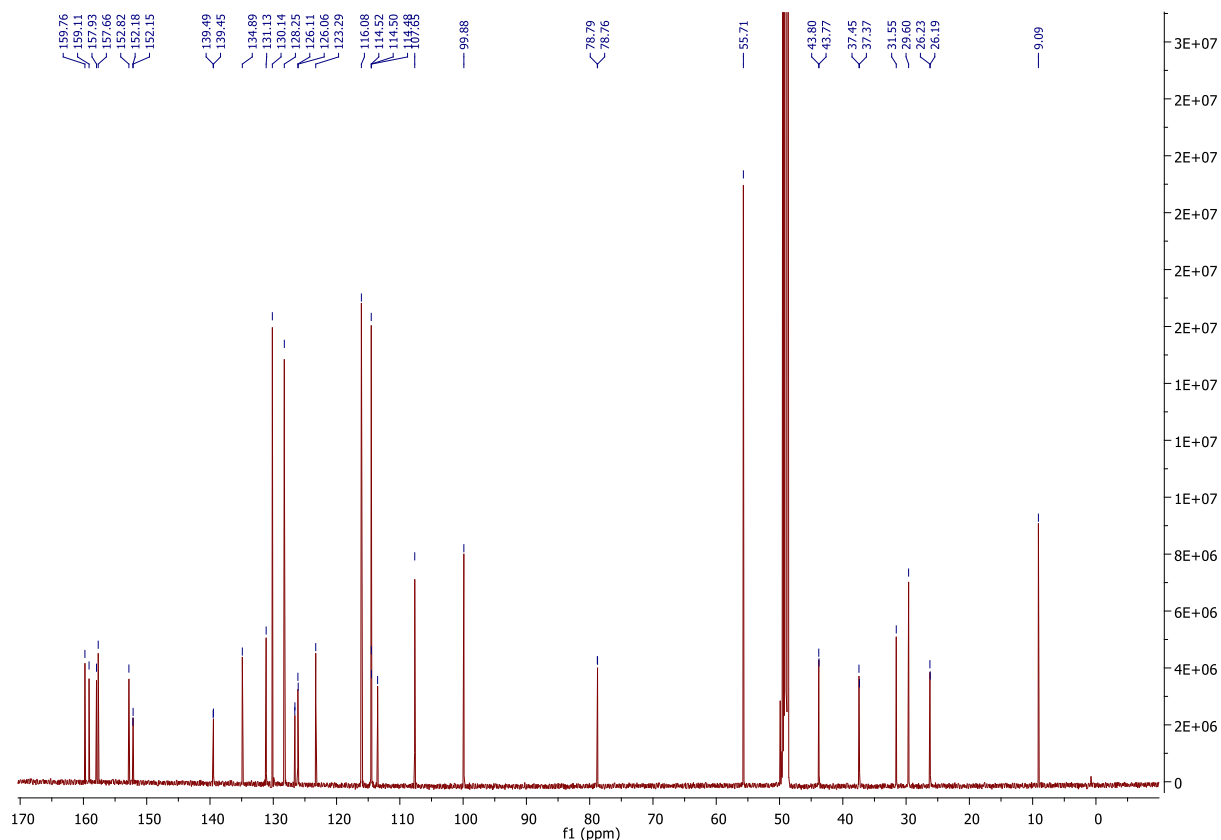

<sup>13</sup>C-NMR spectrum (150.91 MHz, methanol-*d*<sub>4</sub>) of compound **3**

**6-(3-(4-Hydroxy-2-methoxyphenyl)-1-(4-methoxyphenyl)propyl)-2-(4-hydroxyphenyl)-8-**

**methylchroman-7-ol (3).** Red amorphous powder.  $[\alpha]_D^{20} +12.7$  (*c* 0.19, MeOH). UV<sub>max</sub> (MeOH)  $\lambda_{max}$  (log  $\epsilon$ ) 203 (4.04), 224 (2.39), 282 (0.48) nm. <sup>1</sup>H-NMR (600.19 MHz, methanol-*d*<sub>4</sub>; numbering according to shown figure):  $\delta$  (ppm), *J* (Hz): 1.89 (m, H<sub>a</sub>-3), 2.03 (s, 8-CH<sub>3</sub>), 2.07 (m, H<sub>b</sub>-3), 2.09 (m, H- $\alpha$ , 2H), 2.44 (m, H- $\beta$ , 2H), 2.62 (m, H<sub>a</sub>-4), 2.84 (m, H<sub>b</sub>-4), 3.72 (s, 2''-OCH<sub>3</sub>), 3.74 (s, 4'''-OCH<sub>3</sub>), 4.26 (t, *J* = 7.6, H- $\gamma$ ), 4.87 (m, H-2), 6.25 (dd, *J* = 2.3, 8.0, H-5''), 6.36 (d, *J* = 2.3, H-3''), 6.72 (s, H-5), 6.76 (d, *J* = 8.6, H-3'/5'), 6.78 (d, *J* = 8.6, H-3'''/5'''), 6.81 (d, *J* = 8.0, H-6''), 7.16 (d, *J* = 8.6, H-2'''/6'''), 7.22 (d, *J* = 8.6, H-2'/6'). <sup>13</sup>C-NMR (150.91 MHz, methanol-*d*<sub>4</sub>; numbering according to shown figure):  $\delta$  (ppm): 9.1 (8-CH<sub>3</sub>), 26.2 (C-4), 29.6 (C- $\beta$ ), 31.6 (C-3), 37.4 (C- $\alpha$ ), 43.8 (C- $\gamma$ ), 55.7 (2''-OCH<sub>3</sub>, 4'''-OCH<sub>3</sub>), 78.8 (C-2), 99.9 (C-3''), 107.7 (C-5''), 113.5 (C-8), 114.5 (C-10, 3'''/5'''), 116.1 (C-3'/5'), 123.3 (C-1''), 126.1 (C-5), 126.6 (C-6), 128.3 (C-2'/6'), 130.1 (C-2'''/6'''), 131.1 (C-6''), 134.9 (C-1'), 139.5 (C-1'''), 152.2 (C-7), 152.8 (C-9), 157.7 (C-4'), 157.9 (C-4'), 159.1 (C-4'''), 159.8 (C-2'').

### S3. Structure elucidation of the new compound **4**

Compound **4** was obtained as red amorphous powder. The HR-ESI-MS spectra showed a  $[M+H]^+$  ion at  $m/z$  543.2018 (calculated for  $C_{32}H_{31}O_8^+$   $[M+H]^+$ ,  $m/z$  543.2013), corresponding to a molecular formula of  $C_{32}H_{30}O_8$ .

The  $^1H$ -NMR spectrum of **4** showed proton signals of two 1,4-disubstituted aromatic rings [ $\delta_H$  7.33 and 6.82 (both 2H, d, 8.6 Hz) and  $\delta_H$  7.22 and 6.63 (both 2H, d, 8.6 Hz)], three aromatic proton signals of a 1,2,4-trisubstituted benzene ring [ $\delta_H$  6.33 (1H, d, 2.3 Hz), 6.23 (1H, dd, 2.3, 8.0 Hz), 6.81 (1H, d, 8.2 Hz)], proton signals of three methylene groups [ $\delta_H$  2.70 (1H, dd, 2.9, 17.0 Hz) and 3.10 (1H, dd, 6.1, 13.1 Hz); 2.50 (1H, m) and 2.28 (1H, m); 2.36 (1H, m) and 2.51 (1H, m)], one oxymethine proton signal at  $\delta_H$  5.31 (1H, t, 3.0 Hz), one methine proton signal [ $\delta_H$  4.47 (1H, t, 7.5 Hz)], one methyl singlet [ $\delta_H$  1.98 (3H, s)], and a signal corresponding to one methoxy group [ $\delta_H$  3.70 (3H, s)].

The  $^{13}C$ -NMR spectrum and HSQC data of **4** revealed 27 signals with characteristic signals for 14 quaternary aromatic carbons with 8 carbons bearing oxygen, 13 tertiary carbons with 10 aromatic carbons, 3 aliphatic secondary carbons, one methoxy carbon ( $\delta_C$  55.6) and one methyl carbon ( $\delta_C$  8.2). The NMR data of **4** corresponded closely to those of **1** except that an aliphatic methylene carbon was replaced by a carbonyl group ( $\delta_C$  198.5) in **4**, which revealed the presence of a flavanone subunit instead of the flavan part of **1**.

Furthermore, the  $^1H$ -NMR of **4** did not show the singlet signal of a proton at C-5, suggesting an additional substitution at that position, which was identified as a methyl group [ $\delta_H$  1.98 (3H, s);  $\delta_C$  8.2]. A NOESY-cross-peak between the protons of the methoxy group at  $\delta_H$  3.70 and H-3'' ( $\delta_H$  6.33 1H, d, 2.3 Hz) confirmed the location of the methoxy group at C-2''. Analysis of the complete set of NMR data identified **4** as 5,7-dihydroxy-6-(3-(4-hydroxy-2-methoxyphenyl)-1-(4-hydroxyphenyl)propyl)-2-(4-hydroxyphenyl)-8-methylchroman-4-one, representing a new natural product.

Again the 1D-NMR spectra of compound **4** showed for some signals a signal doubling mainly for protons/carbons (H-2, H<sub>b</sub>-3, H- $\gamma$ , -OCH<sub>3</sub> at C-2'', and H-5''; C-2, C-3, C-6, C- $\alpha$ , C- $\beta$ , C- $\gamma$ , C-1'', and C-1''') accompanying the stereo centers (C-2 and C- $\gamma$ ) of the compound, suggesting the presence of isomers and/or rotamers. The chiral HPLC analysis of compound **4** revealed the presence of at least two of the four possible isomers of the compound (Section 1) and confirmed thereby this assumption.



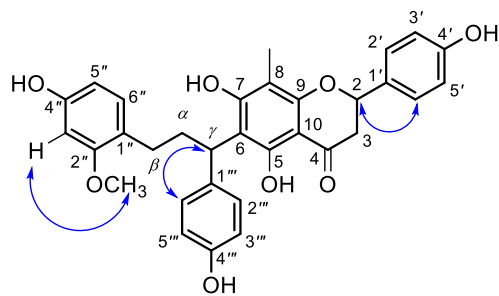

Structure of compound **4** with key NOESY-correlations.

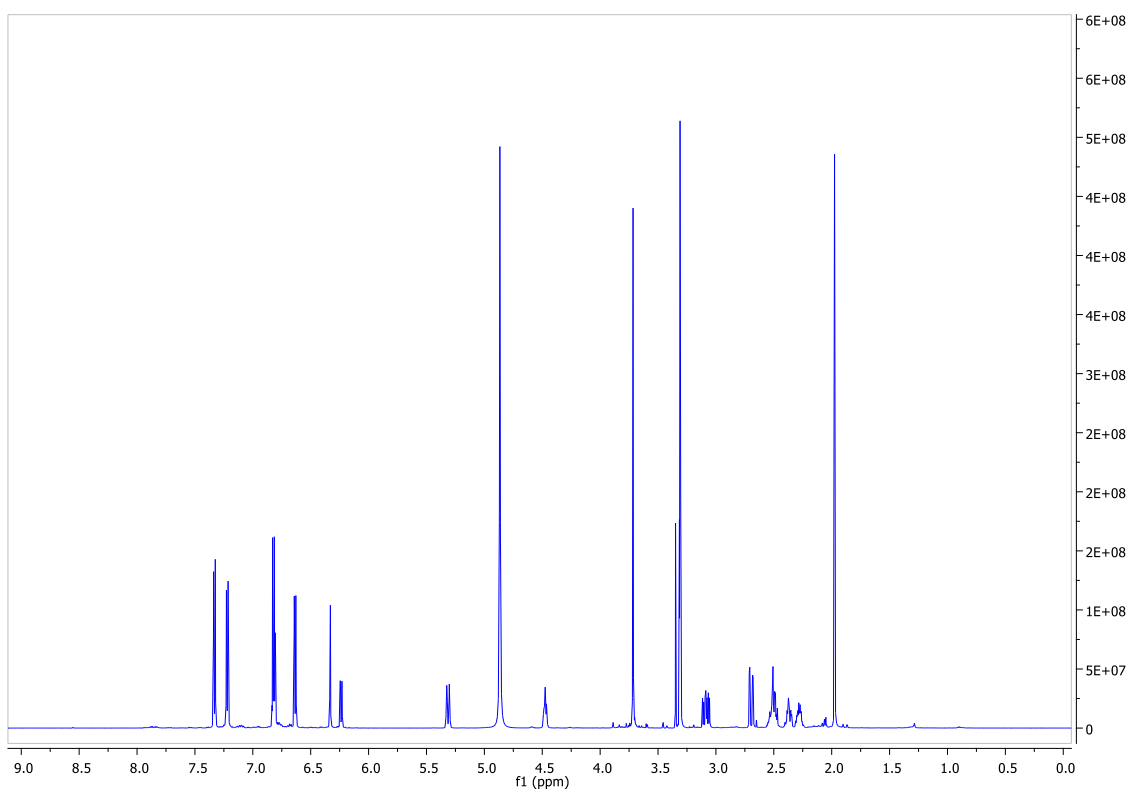

$^1\text{H-NMR}$  spectrum (600.19 MHz, methanol- $d_4$ ) of compound **4**.

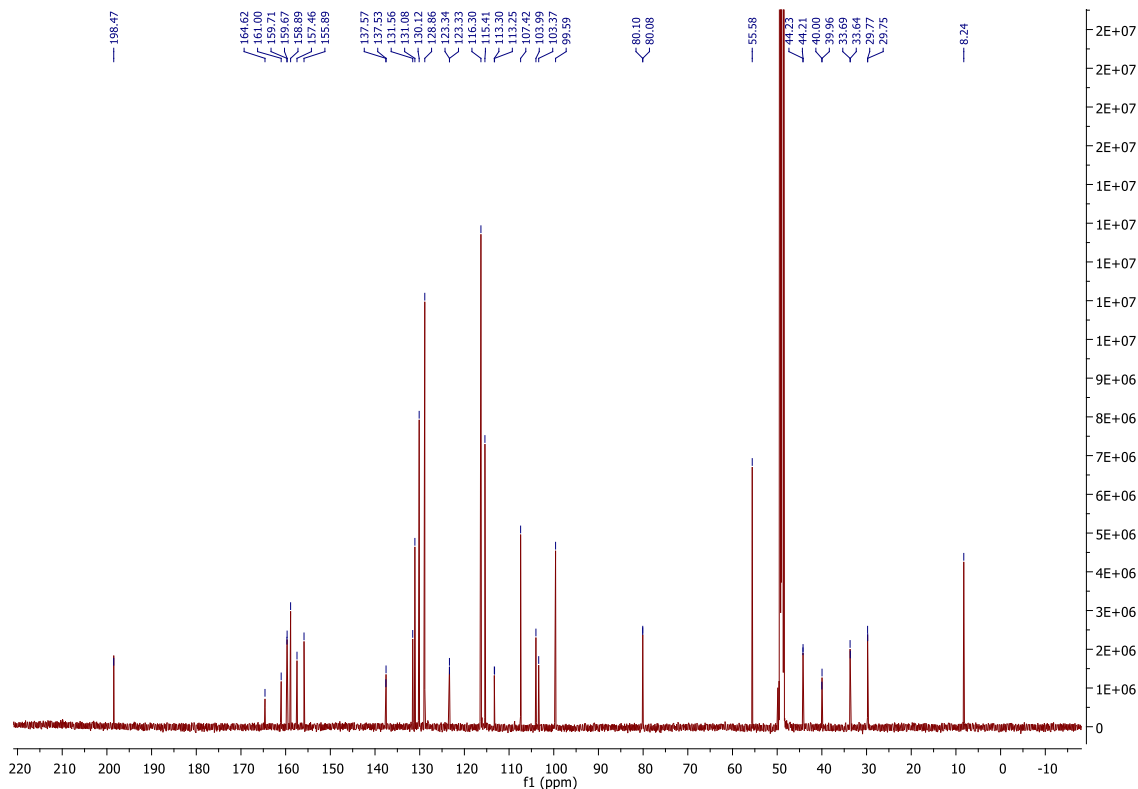

$^{13}\text{C}$ -NMR spectrum (150.91 MHz, methanol- $d_4$ ) of compound **4**.

**5,7-Dihydroxy-6-(3-(4-hydroxy-2-methoxyphenyl)-1-(4-hydroxyphenyl)propyl)-2-(4-**

**hydroxyphenyl)-8-methylchroman-4-one (4).** Pale red powder.  $[\alpha]_D^{20}$  -3.4 ( $c$  0.23, MeOH).  $\text{UV}_{\text{max}}$  (MeOH)  $\lambda_{\text{max}}$  (log  $\epsilon$ ) 199 (4.35), 227 (1.84), 286 (0.69), 300 (0.67) nm.  $^1\text{H}$ -NMR (600.19 MHz, methanol- $d_4$ ; numbering according to shown figure):  $\delta$  (ppm),  $J$  (Hz): 1.98 (s, 8- $\text{CH}_3$ ), 2.28 (m,  $\text{H}_a$ - $\alpha$ ), 2.36 (m,  $\text{H}_a$ - $\beta$ ), 2.50 (m,  $\text{H}_b$ - $\alpha$ ), 2.51 (m,  $\text{H}_b$ - $\beta$ ), 2.70 (dd,  $J = 17.0, 2.9$ ,  $\text{H}_a$ -3), 3.10 (dd,  $J = 13.1, 6.1$ ,  $\text{H}_b$ -3), 3.70 (s, 2''- $\text{OCH}_3$ ), 4.47 (m,  $\text{H}$ - $\gamma$ ), 5.31 (t,  $J = 3.0$ ,  $\text{H}$ -2), 6.24 (dd,  $J = 2.3, 8.0$ ,  $\text{H}$ -5''), 6.33 (d,  $J = 2.3$ ,  $\text{H}$ -3''), 6.63 (d,  $J = 8.6$ ,  $\text{H}$ -3'''/5'''), 6.81 (d,  $J = 8.2$ ,  $\text{H}$ -6''), 6.82 (d,  $J = 8.6$ ,  $\text{H}$ -3'/5'), 7.22 (d,  $J = 8.6$ ,  $\text{H}$ -2'''/6'''), 7.33 (d,  $J = 8.6$ ,  $\text{H}$ -2'/6').  $^{13}\text{C}$ -NMR (150.91 MHz, methanol- $d_4$ ; numbering according to shown figure):  $\delta$  (ppm): 8.2 (8- $\text{CH}_3$ ), 29.8 (C- $\beta$ ), 33.7 (C- $\alpha$ ), 40.0 (C- $\gamma$ ), 44.2 (C-3), 55.6 (2'- $\text{OCH}_3$ ), 80.1 (C-2), 99.6 (C-3'), 103.4 (C-10), 104.0 (C-8), 107.4 (C-5''), 113.3 (C-6), 115.4 (C-3'''/5'''), 116.3 (C-3'/5'), 123.3 (C-1''), 128.9 (C-2'/6'), 130.1 (C-2'''/6'''), 131.1 (C-6''), 131.6 (C-1'), 137.6 (C-1'''), 155.9 (C-4'''), 157.5 (C-4''), 158.9 (C-4'), 159.7 (C-9, C-2''), 161.0 (C-5), 164.6 (C-7), 198.5 (C-4).

#### S4. Structure elucidation of the new compound **5**

Compound **5** was obtained as pinkish amorphous powder. The HR-ESI-MS spectra of compound **5** showed a  $[M+H]^+$  ion at  $m/z$  543.2382 (calculated for  $C_{33}H_{35}O_7$   $[M+H]^+$ ,  $m/z$  543.2377), corresponding to a molecular formula of  $C_{33}H_{34}O_7$ . The  $^1H$ -NMR spectrum of **5** showed proton signals of two AA'BB' systems [ $\delta_H$  7.86 and 6.89 (both 2H, d, 8.6 Hz) as well as  $\delta_H$  7.04 and  $\delta$  6.66 (both 2H, d, 8.5 Hz)], three aromatic proton signals of an ABX-system [ $\delta_H$  6.35 (1H, d, 2.2 Hz), 6.26 (1H, dd, 2.2, 8.0 Hz), 6.79 (1H, d, 8.1 Hz), two singlet aromatic proton signals ( $\delta_H$  6.35 (1H, s) and 6.87 (1H, s)], proton signals corresponding to four methylene groups [ $\delta_H$  3.09 (2H, m), 2.87 (2H, m), 2.37 (2H, m), and 2.04 (2H, m)] and signals of three methoxy groups [ $\delta_H$  3.72 (6H, s) and 3.79 (3H, s)]. The  $^{13}C$ -NMR spectrum and HSQC data of **5** revealed 29 signals with characteristic signals for a carbonyl group at  $\delta_C$  202.2, 24 aromatic carbons with 6 carbons bearing oxygen, 4 aliphatic methylene carbons, and three methoxy carbon signals [ $\delta_C$  55.7 (2C) and 56.0]. Comparison of the NMR data of **5** with those of the known biflavonoid **6** (cochininenene C) revealed as only difference between **5** and **6** the methoxy group location. HMBC data indicated that the methoxy groups of **5** are located at C-2, C-4', and C-2''. This positioning could be confirmed by the observed NOESY contacts between the methoxy group at  $\delta_H$  3.79 and H-3'/5' ( $\delta_H$  6.88) and between the methoxy group proton signals at  $\delta_H$  3.72 and H-3, H-6'', respectively. A detailed overview of the observed key correlations is given in the  $^{13}C$ -NMR spectrum below. The structure of **5** was therefore established as the new natural product 3-(4-hydroxy-5-(3-(4-hydroxy-2-methoxyphenyl)-1-(4-hydroxyphenyl)propyl)-2-methoxyphenyl)-1-(4-methoxyphenyl)propan-1-one. The chiral HPLC analysis of compound **5** (Section 1) revealed the presence of both possible two isomers.

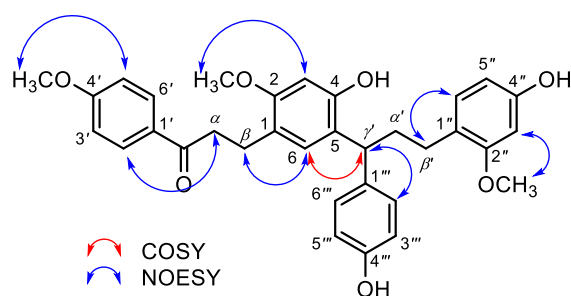

Structure of compound **5** with key correlations.

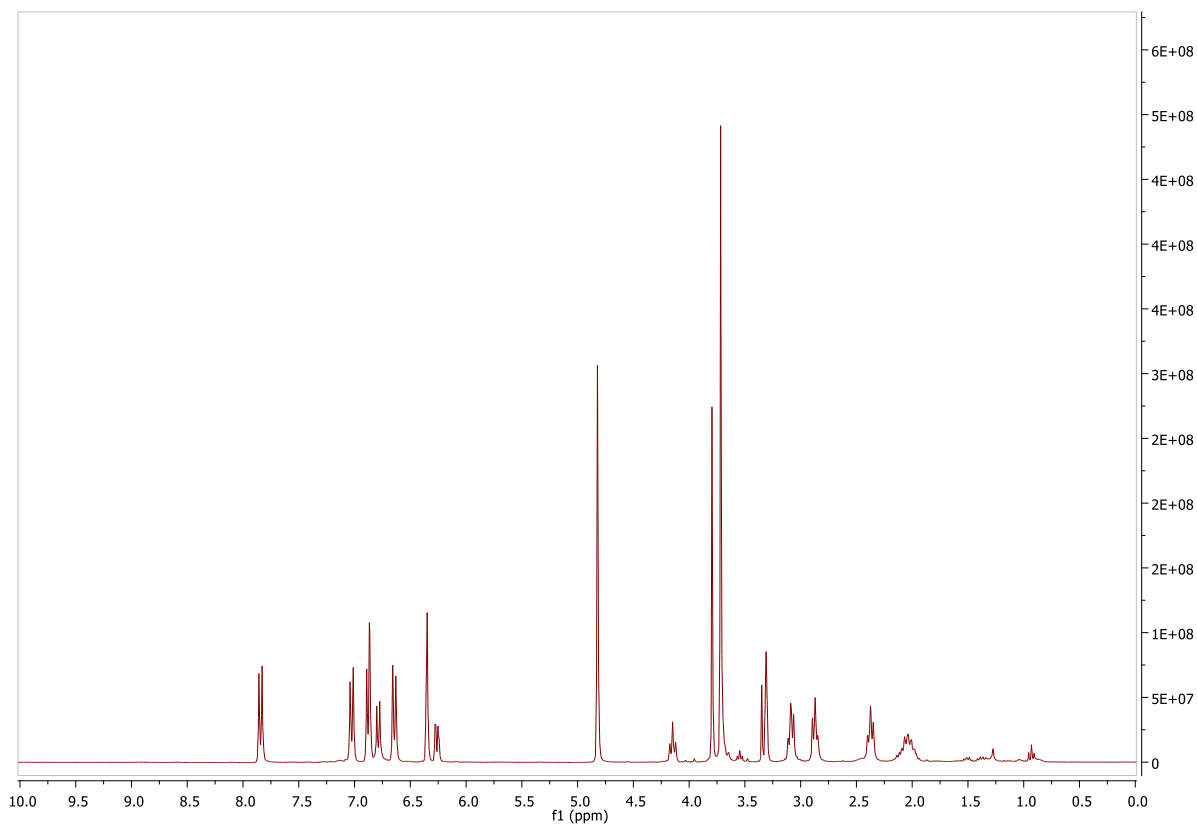

<sup>1</sup>H-NMR spectrum (600.19 MHz, methanol-*d*<sub>4</sub>) of compound **5**.

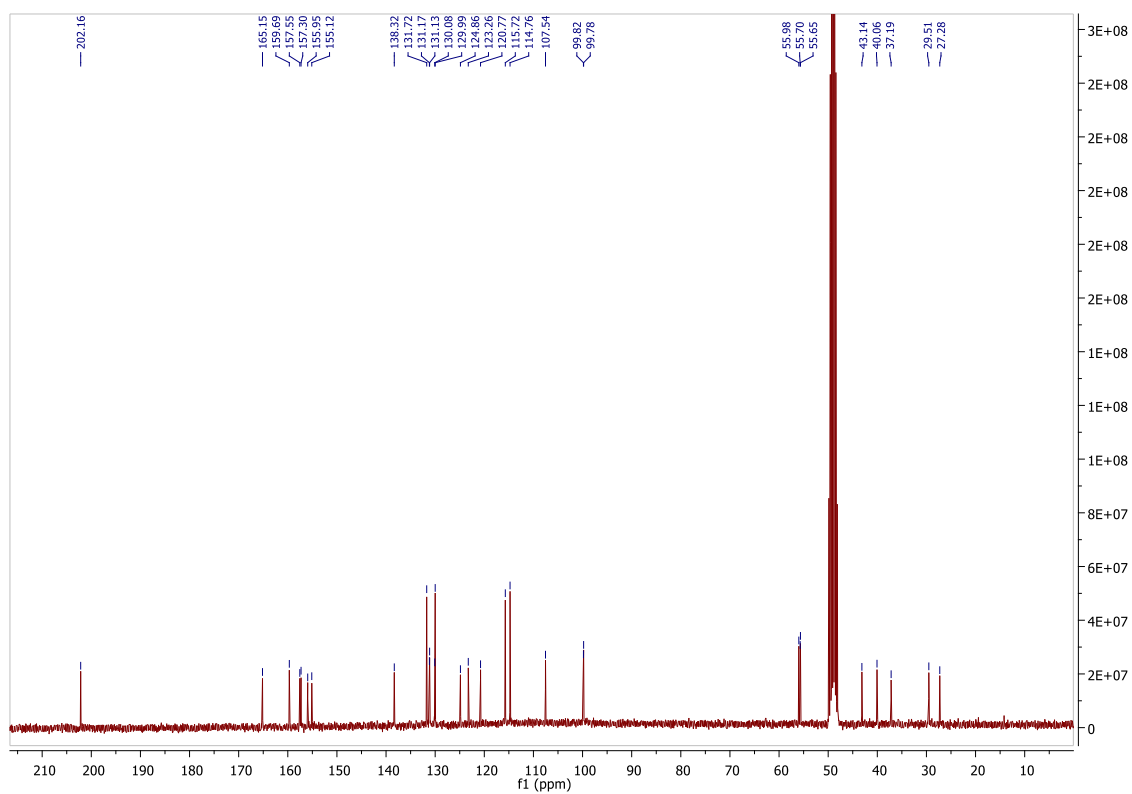

<sup>13</sup>C-NMR spectrum (150.91 MHz, methanol-*d*<sub>4</sub>) of compound **5**.

### 3-(4-Hydroxy-5-(3-(4-hydroxy-2-methoxyphenyl)-1-(4-hydroxyphenyl)propyl)-2-

**methoxyphenyl)-1-(4-methoxyphenyl)propan-1-one (5).** Pinkish amorphous powder.  $[\alpha]_D^{20} +12.4$  ( $c$  0.24, MeOH). UV<sub>max</sub> (MeOH)  $\lambda_{max}$  (log  $\epsilon$ ) 202 (4.56), 222 (1.74), 280 (1.07) nm. <sup>1</sup>H-NMR (600.19 MHz, methanol-*d*<sub>4</sub>; numbering according to shown figure):  $\delta$  (ppm),  $J$  (Hz): 2.04 (m, H- $\alpha'$ ), 2.37 (m, H- $\beta'$ ), 2.87 (m, H- $\beta$ ), 3.09 (m, H- $\alpha$ ), 3.72 (s, 2-OCH<sub>3</sub>, 2''-OCH<sub>3</sub>), 3.79 (s, 4'-OCH<sub>3</sub>), 4.15 (t,  $J = 7.8$ , H- $\gamma'$ ), 6.26 (dd,  $J = 8.0, 2.2$ , H-5''), 6.35 (d,  $J = 2.2$ , H-3''), 6.35 (s, H-3), 6.64 (d,  $J = 8.4$ , H-3'''/5'''), 6.79 (d,  $J = 8.1$ , H-6''), 6.87 (s, H-6), 6.88 (d,  $J = 8.5$ , H-3'/5'), 7.03 (d,  $J = 8.5$ , H-2'''/6'''), 7.84 (d,  $J = 8.8$ , H-2'/6'). <sup>13</sup>C-NMR (150.91 MHz, methanol-*d*<sub>4</sub>; numbering according to shown figure):  $\delta$  (ppm): 27.3 (C- $\beta$ ), 29.5 (C- $\beta'$ ), 37.2 (C- $\alpha'$ ), 40.1 (C- $\alpha$ ), 43.1 (C- $\gamma'$ ), 55.7 (2-OCH<sub>3</sub>, 2''-OCH<sub>3</sub>), 56.0 (4'-OCH<sub>3</sub>), 99.8 (C-3, C-3''), 107.5 (C-5''), 114.8 (C-3'/5'), 115.7 (C-3'''/5'''), 120.8 (C-1), 123.3 (C-1''), 124.9 (C-5), 130.0 (C-2'''/6'''), 130.1 (C-6), 131.1 (C-6''), 131.2 (C-1'), 131.7 (C-2'/6'), 138.3 (C-1'''), 155.1 (C-4), 156.0 (C-4'''), 157.3 (C-2), 157.6 (C-4''), 159.7 (C-2''), 165.2 (C-4'), 202.2 (C=O).

## S5. Compounds isolated from bioactive subfractions

We isolated 18 (poly)phenolic compounds from the subfractions 5, 7 and 9-12 of the ethyl acetate subfraction that was prepared from the ethanol extract of *Dracaena cambodiana* red wood material (Table 1): the dimeric phenolic compounds 8-methylsocotrin-4'-ol (**1** and **2**)<sup>1</sup>, 8-methylsocotrin-4'-ol-4'''-methylether (**3**), 2-(4-hydroxyphenyl)-5-hydroxy-6-[1-(4-hydroxyphenyl)-3-(4-hydroxy-2-methoxy-phenyl)propyl]-8-methylchroman-4-one-7-ol (**4**), 3-(4-hydroxy-5-(3-(4-hydroxy-2-methoxyphenyl)-1-(4-hydroxyphenyl)propyl)-2-methoxyphenyl)-1-(4-methoxyphenyl)propan-1-one (**5**), cochinchinenin C (**6**)<sup>2</sup>, 3-[4-hydroxy-5-[3-(4-hydroxy-2-methoxyphenyl)-1-(4-hydroxyphenyl)propyl]-2-methoxyphenyl]-1-(4-hydroxyphenyl)-propanone (**7**)<sup>3</sup>, as well as the corresponding monomers and structurally related compounds 7,4'-dihydroxyflavan (**8**)<sup>4</sup>, 7-methoxy-4'-flavonol (**9**)<sup>4</sup>, 8-methylnaringenin (**10**)<sup>5</sup>, liquiritigenin (**11**)<sup>5</sup>, 7,4'-dihydroxyflavone (**12**)<sup>6</sup>, 2,4,4'-trihydroxydihydrochalcone (**13**)<sup>7</sup>, loureirin C (**14**)<sup>8</sup>, 2'-methoxyisoliquiritigenin (**15**)<sup>9</sup>, 2,4'-dihydroxy-4-methoxychalcone (**16**)<sup>10</sup>, resveratrol (**17**)<sup>11</sup>, and *p*-hydroxy benzoic acid (**18**)<sup>12</sup>.

Compounds **1** and **2**<sup>1</sup>, **11**<sup>13</sup>, **12**<sup>14</sup>, **14**<sup>13</sup>, **15**<sup>13</sup>, and **17**<sup>15</sup> have previously been identified as constituents of *D. cambodiana*. The natural products **6**, **7**, **8**, **13**, and **18** are new for *D. cambodiana*, however, they have previously been isolated from other *Dracaena* species. In particular, **6** and **7** have previously been obtained from *D. cochinchinensis*<sup>2</sup>, **8** from *D. loureiri*<sup>16</sup>, **13** from *D. draco*<sup>7</sup> and *D. cochinchinensis*<sup>2</sup>, and compound **18** from *D. angustifolia*<sup>17</sup>. This is the first report of compounds **9**, **10**, and **16** from a *Dracaena* species. Compounds **3-5** represent new natural products.

## References

- 1 Guan J, Guo S-X. Three New Biflavonoids from Chinese Dragon's Blood, *Dracaena cochinchinensis*. *Nat Prod Commun* 2012;**7**:1934578X1200700510.
- 2 Zhu Y, Zhang P, Yu H, Li J, Wang MW, Zhao W. Anti-Helicobacter pylori and thrombin inhibitory components from Chinese dragon's blood, *Dracaena cochinchinensis*. *J Nat Prod* 2007;**70**:1570-7.
- 3 Tobinaga SO, Satoshi; Koike, Takeshi; Takano, Akito Tetra-phenol substituted propanones and their use for granulation tissue formation enhancers and cancer cell apoptosis inducers. *Jpn patent*. JP 2006241078 A 20060914. 2006.
- 4 González AG, León F, Hernández JC, Padrón JI, Sánchez-Pinto L, Barrera JB. Flavans of dragon's blood from *Dracaena draco* and *Dracaena tamaranae*. *Biochem Syst Ecol* 2004;**32**:179-84.
- 5 Zhao J, Ding HX, Zhao DG, Wang CM, Gao K. Isolation, modification and cytotoxic evaluation of flavonoids from *Rhododendron hainanense*. *J Pharm Pharmacol* 2012;**64**:1785-92.
- 6 Park Y, Moon BH, Lee E, Lee Y, Yoon Y, Ahn JH, et al. <sup>1</sup>H and <sup>13</sup>C-NMR data of hydroxyflavone derivatives. *Magn Reson Chem* 2007;**45**:674-9.
- 7 González AG, León F, Sánchez-Pinto L, Padrón JI, Bermejo J. Phenolic compounds of Dragon's blood from *Dracaena draco*. *J Nat Prod* 2000;**63**:1297-9.
- 8 Meksuriyen D, Cordell GA. Retrodihydrochalcones from *Dracaena Loureiri*. *J Nat Prod* 1988;**51**:1129-35.
- 9 Yahara S, Ogata T, Saijo R, Konishi R, Yamahara J, Miyahara K, et al. Isoflavan and related compounds from *Dalbergia odorifera*. I. *Chem Pharm Bull* 1989;**37**:979-87.
- 10 Wang DY, Dai Y, Tong L, Cai B. Studies on chemical constituents of *Oxytropis falcata*(II). *Zhongguo Yaoxue Zazhi* 2008;**43**:1292-4.
- 11 Mannila E, Talvitie A, Kolehmainen E. Anti-leukaemic compounds derived from stilbenes in *Picea abies* bark. *Phytochemistry* 1993;**33**:813-6.
- 12 Shataer D, Abdulla R, Ma QL, Liu GY, Aisa HA. Chemical composition of extract of *Corylus avellana* shells. *Chem Nat Compd* 2020;**56**:338-40.
- 13 Luo Y, Wang H, Zhao YX, Zeng YB, Shen HY, Dai HF, et al. Cytotoxic and antibacterial flavonoids from dragon's blood of *Dracaena cambodiana*. *Planta Med* 2011;**77**:2053-6.
- 14 Luo Y, Dai HF, Wang H, Mei WL. Chemical constituents from Dragon's blood of *Dracaena cambodiana*. *Chin J Nat Med* 2011;**9**:112-4.
- 15 Fan LL, Tu PF, Chen HB, Cai SQ. Simultaneous quantification of five major constituents in stems of *Dracaena* plants and related medicinal preparations from China and Vietnam by HPLC-DAD. *Biomed Chromatogr* 2009;**23**:1191-200.
- 16 Meksuriyen D, Cordell GA. Traditional medicinal plants of Thailand. XIII. Flavonoid derivatives from *Dracaena loureiri* (Agavaceae). *J Sci Soc Thailand* 1988;**14**:3-24.
- 17 Huang HC, Lin MK, Hwang SY, Hwang TL, Kuo YH, Chang CI, et al. Two anti-inflammatory steroidal saponins from *Dracaena angustifolia* Roxb. *Molecules* 2013;**18**:8752-63.

## Supporting figures

**A**

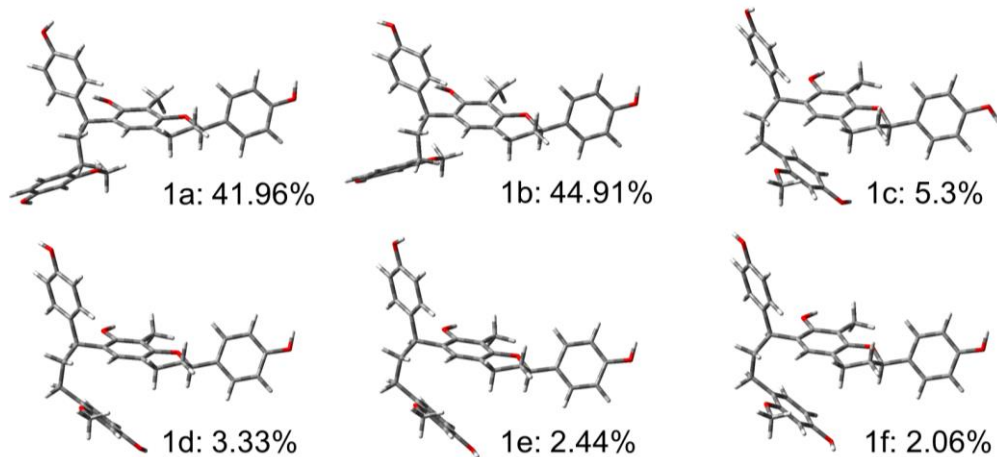

**B**

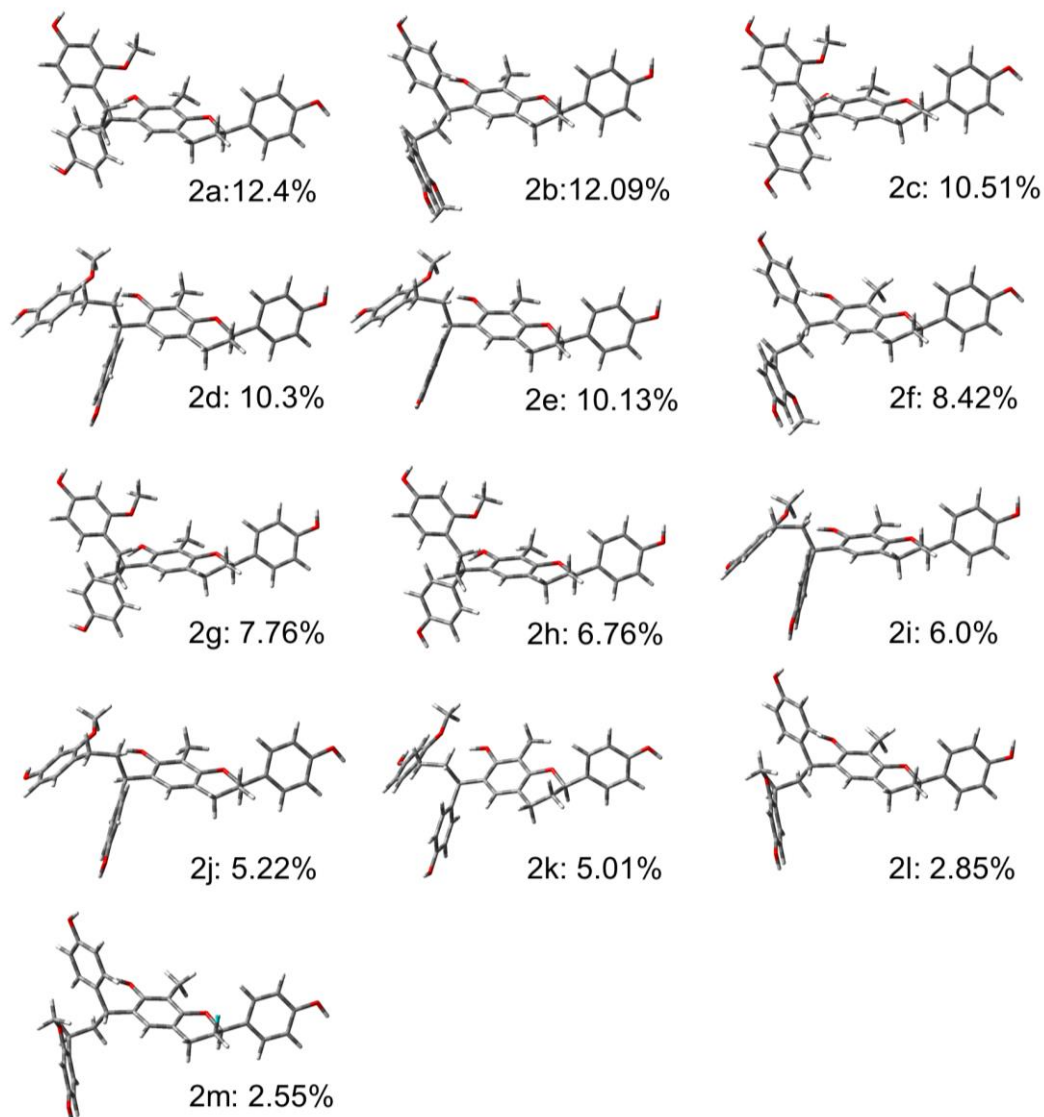

**Figure S1** Low energy conformers used for ECD calculation. (A) Compound **1**. (B) Compound **2**.

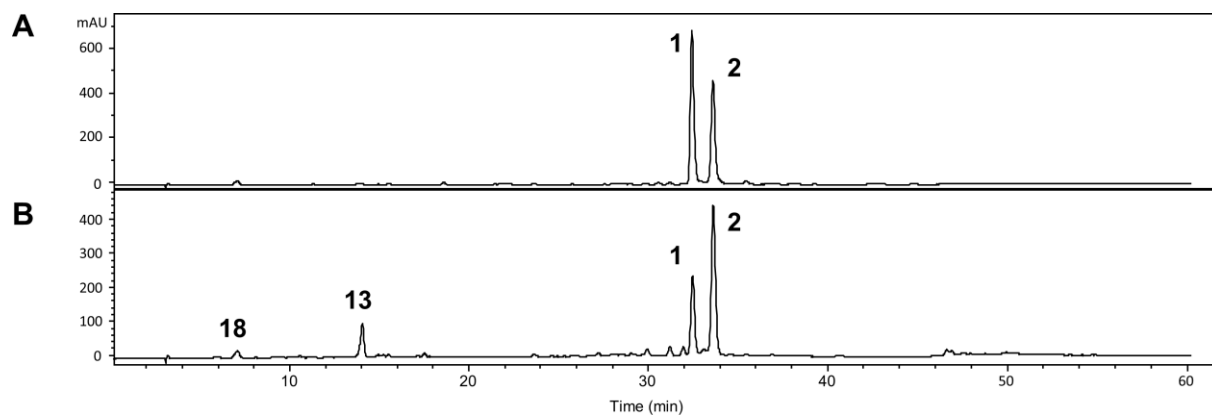

**Figure S2** HPLC chromatograms of the most active subfractions. The ethanolic *D. cambodiana* extract was fractionated and the obtained EtOAc fraction was further separated. (A, B) HPLC chromatograms of the most active subfractions 11 (A) and 12 (B) at 280 nm with assigned compounds (see 2.2. for HPLC conditions).



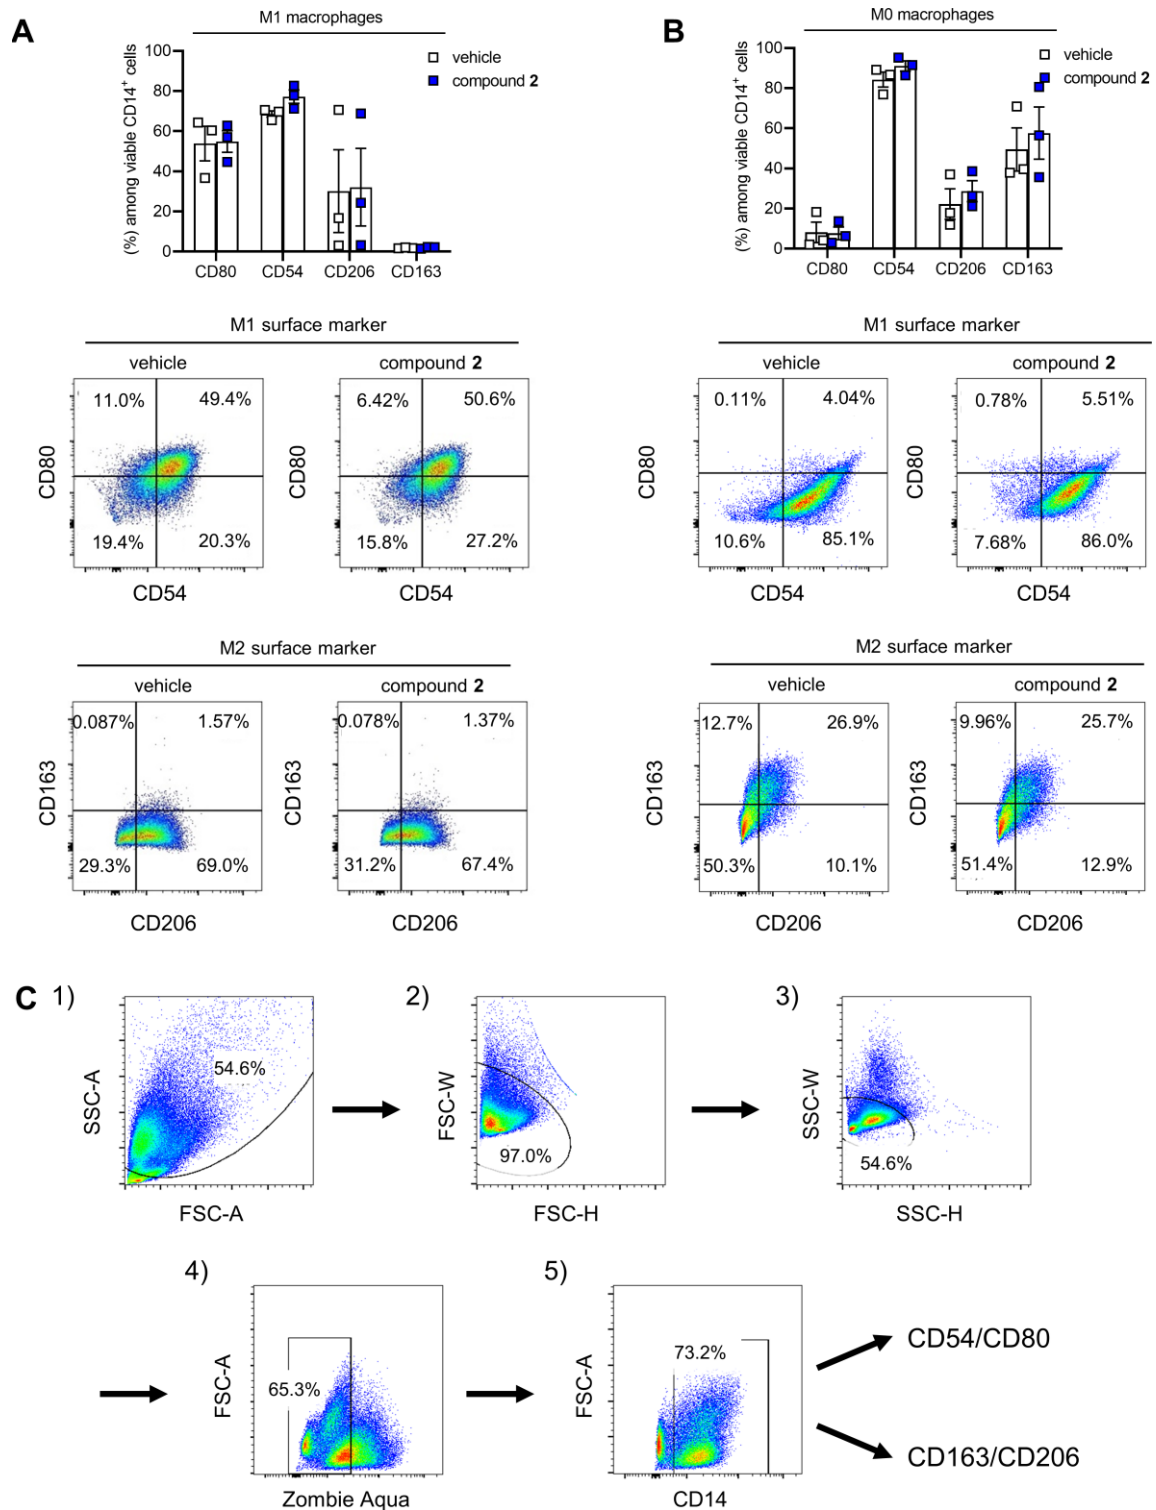

**Figure S3** Macrophage polarization is not influenced by compound 2. Human monocyte-derived macrophages (M0) were pre-treated with vehicle (DMSO) or compound 2 (3  $\mu\text{mol/L}$ ) for 15 min and then polarized for 48 h with LPS/IFN- $\gamma$  to the M1 phenotype. (A, B) Expression of M1 (CD54 and CD80) and M2 surface markers (CD163 and CD206) among CD14<sup>+</sup> cells in M1 (A) and M0 macrophages (B) is shown in bar charts and pseudocolor dot plots. Results are given as mean  $\pm$  S.E.M., percentage among viable CD14<sup>+</sup> cells,  $n = 3$ ; paired  $t$ -test. (C) Gating strategy.

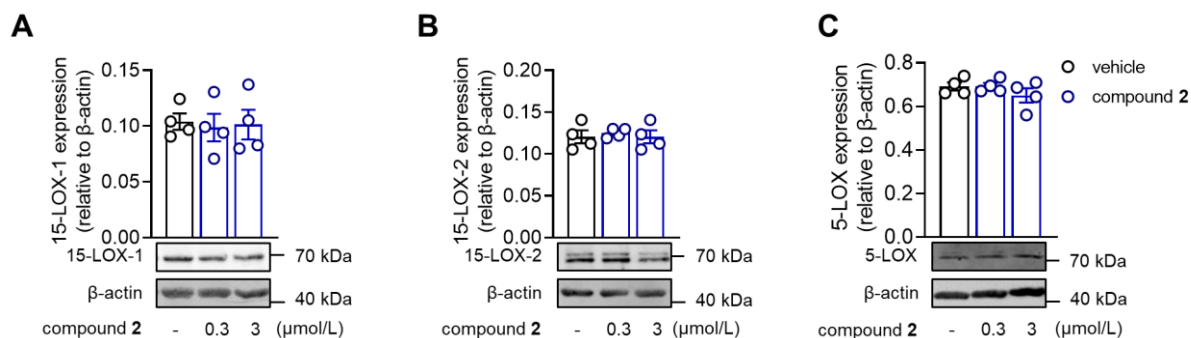

**Figure S4** Compound **2** neither affects 15-LOX-1, 15-LOX-2, nor 5-LOX expression. Human monocyte-derived M2 macrophages were treated with vehicle (DMSO) or compound **2** for 24 h. (A–C) Protein expression and densitometric analysis of (A) 15-LOX-1, (B) 15-LOX-2 and (C) 5-LOX. Results are given as mean  $\pm$  SEM, normalized to  $\beta$ -actin. Western blots are representative for  $n = 4$  independent donors and treatments.

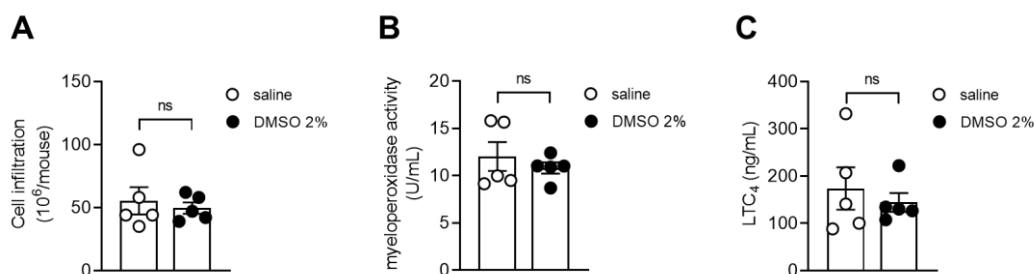

**Figure S5** DMSO as vehicle does hardly influence cell infiltration and  $\text{LTC}_4$  levels in zymosan-induced peritonitis in mice. Saline or DMSO (2%) were i.p. administrated 30 min before zymosan injection. Mice were sacrificed 4 h (A, B) or 30 min (C) after receiving zymosan. (A) Cell infiltration into the peritoneal cavity. (B) Myeloperoxidase activity of infiltrated cells as marker for neutrophils. (C)  $\text{LTC}_4$  levels of the peritoneal exudate. Data are shown as mean  $\pm$  SEM and single data points,  $n = 5$  mice; ns, non-significant; unpaired  $t$ -test.

## Supporting tables

**Table S1** Inhibition of 5-LOX, 15-LOX, and 12-LOX product formation by Vietnamese plant extracts in activated PMNL.

| Latin plant name                 | Plant family  | Plant organ  | Extraction solvent | 5-LOX at 30 µg/mL <sup>a</sup> | 5-LOX IC <sub>50</sub> <sup>b</sup> | 15-LOX at 30 µg/mL <sup>a</sup> | 12-LOX at 30 µg/mL <sup>a</sup> |
|----------------------------------|---------------|--------------|--------------------|--------------------------------|-------------------------------------|---------------------------------|---------------------------------|
| <i>Solanum</i> sp.               | Solanaceae    | Stems        | Chloroform         | 87 ± 29                        | n.d. <sup>c</sup>                   | 390 ± 284                       | 108 ± 7                         |
|                                  |               |              | Methanol           | 102 ± 4                        | n.d.                                | 103 ± 1                         | 101 ± 5                         |
|                                  |               | Fruits       | Chloroform         | 98 ± 8                         | n.d.                                | 101 ± 1                         | 100 ± 3                         |
|                                  |               |              | Methanol           | 94 ± 10                        | n.d.                                | 126 ± 19                        | 105 ± 1                         |
|                                  |               |              | Chloroform         | 32 ± 14                        | 21.6 ± 3.9                          | 94 ± 2                          | 83 ± 6                          |
| <i>Solanum</i> sp.               | Solanaceae    | Stems        | Methanol           | 102 ± 11                       | n.d.                                | 116 ± 9                         | 101 ± 5                         |
|                                  |               |              | Chloroform         | 86 ± 31                        | n.d.                                | 150 ± 30                        | 105 ± 15                        |
|                                  |               | Leaves       | Methanol           | 104 ± 9                        | n.d.                                | 115 ± 17                        | 96 ± 1                          |
|                                  |               |              | Chloroform         | 41 ± 14                        | 24.8 ± 8.2                          | 83 ± 13                         | 98 ± 10                         |
|                                  |               |              | Methanol           | 100 ± 8                        | n.d.                                | 154 ± 36                        | 104 ± 10                        |
| <i>Calophyllum inophyllum</i>    | Clusiaceae    | Bark         | Chloroform         | 8 ± 6                          | 17.7 ± 1.3                          | 158 ± 23                        | 86 ± 14                         |
|                                  |               |              | Methanol           | 59 ± 12                        | n.d.                                | 138 ± 32                        | 108 ± 8                         |
|                                  |               | Seed         | Chloroform         | 3 ± 3                          | 14.8 ± 0.7                          | 124 ± 94                        | 128 ± 29                        |
|                                  |               |              | Coat               | Methanol                       | 301 ± 9                             | 21.3 ± 2.6                      | 190 ± 39                        |
| <i>Brucea mollis</i>             | Simaroubaceae | Semen        | Chloroform         | 71 ± 11                        | n.d.                                | 109 ± 4                         | 75 ± 12                         |
|                                  |               |              | Methanol           | 61 ± 4                         | n.d.                                | 101 ± 1                         | 73 ± 5                          |
| <i>Artemisia vulgaris</i>        | Asteraceae    | Aerial parts | Chloroform         | 47 ± 7                         | 30.0 ± 5.6                          | 216 ± 123                       | 335 ± 223                       |
|                                  |               |              | Methanol           | 92 ± 3                         | n.d.                                | 92 ± 1                          | 92 ± 13                         |
| <i>Piper lolot</i>               | Piperaceae    | Leaves       | Chloroform         | 70 ± 2                         | n.d.                                | 124 ± 53                        | 122 ± 40                        |
|                                  |               |              | Methanol           | 95 ± 9                         | n.d.                                | 141 ± 30                        | 104 ± 6                         |
| <i>Cibotium barometz</i>         | Dicksoniaceae | Rhizome      | Chloroform         | 66 ± 11                        | n.d.                                | 101 ± 7                         | 114 ± 9                         |
|                                  |               |              | Methanol           | 87 ± 11                        | n.d.                                | 114 ± 20                        | 99 ± 5                          |
| <i>Drynaria fortunei</i>         | Polygonaceae  | Rhizome      | Chloroform         | 96 ± 12                        | n.d.                                | 95 ± 19                         | 94 ± 10                         |
|                                  |               |              | Methanol           | 53 ± 1                         | n.d.                                | 187 ± 70                        | 79 ± 14                         |
| <i>Momordica cochinchinensis</i> | Cucurbitaceae | Seed         | Chloroform         | 56 ± 12                        | n.d.                                | 65 ± 22                         | 79 ± 18                         |
|                                  |               |              | Coat               | Methanol                       | 65 ± 2                              | n.d.                            | 137 ± 49                        |
|                                  |               | Seedling     | Chloroform         | 78 ± 11                        | n.d.                                | 113 ± 10                        | 136 ± 16                        |
|                                  |               |              | Methanol           | 100 ± 4                        | n.d.                                | 97 ± 7                          | 115 ± 18                        |
|                                  |               | Leaves       | Chloroform         | 59 ± 1                         | n.d.                                | 96 ± 6                          | 96 ± 6                          |
|                                  |               |              | Methanol           | 95 ± 1                         | n.d.                                | 119 ± 7                         | 102 ± 3                         |
|                                  |               | Roots        | Chloroform         | 98 ± 12                        | n.d.                                | 66 ± 25                         | 111 ± 10                        |
|                                  |               |              | Methanol           | 53 ± 12                        | n.d.                                | 153 ± 19                        | 116 ± 28                        |
|                                  |               | Bark         | Chloroform         | 115 ± 11                       | n.d.                                | 96 ± 2                          | 90 ± 13                         |
|                                  |               |              | Methanol           | 99 ± 6                         | n.d.                                | 77 ± 16                         | 97 ± 4                          |
| <i>Dracaena cambodiana</i>       | Dracaenaceae  | Wood         | Chloroform         | 7 ± 2                          | 2.1 ± 0.7                           | 76 ± 9                          | 73 ± 6                          |
|                                  |               |              | Methanol           | 4 ± 2                          | 0.4 ± 0.2                           | 127 ± 16                        | 38 ± 6                          |
| <i>Siegesbeckia orientalis</i>   | Asteraceae    | Aerial parts | Chloroform         | 73 ± 3                         | n.d.                                | 80 ± 6                          | 97 ± 8                          |
|                                  |               |              | Methanol           | 108 ± 0                        | n.d.                                | 127 ± 29                        | 114 ± 1                         |
| <i>Vitex rotundifolia</i>        | Verbernaceae  | Leaves       | Chloroform         | 13 ± 1                         | 15.0 ± 0.8                          | 159 ± 21                        | 77 ± 15                         |
|                                  |               |              | Methanol           | 96 ± 4                         | n.d.                                | 122 ± 20                        | 99 ± 8                          |
|                                  |               | Fruits       | Chloroform         | 12 ± 3                         | 10.6 ± 7.1                          | 44 ± 5                          | 39 ± 39                         |
|                                  |               |              | Methanol           | 66 ± 8                         | n.d.                                | 107 ± 5                         | 87 ± 6                          |
| <i>Caesalpinia bonduc</i>        | Fabaceae      | Seedling     | Chloroform         | 95 ± 6                         | n.d.                                | 84 ± 5                          | 100 ± 11                        |
|                                  |               |              | Methanol           | 96 ± 4                         | n.d.                                | 99.3 ± 8                        | 101 ± 2                         |
| <i>Aleurites moluccana</i>       | Euphorbiaceae | Leaves       | Chloroform         | 84 ± 1                         | n.d.                                | 143 ± 63                        | 132 ± 36                        |
|                                  |               |              | Methanol           | 116 ± 1                        | n.d.                                | 93 ± 26                         | 92 ± 9                          |
|                                  |               | Stems        | Chloroform         | 19 ± 3                         | 19.5 ± 1.9                          | 157 ± 11                        | 81 ± 3                          |
|                                  |               |              | Methanol           | 105 ± 2                        | n.d.                                | 127 ± 15                        | 106 ± 6                         |
|                                  |               | Roots        | Chloroform         | 84 ± 2                         | n.d.                                | 144 ± 91                        | 130 ± 42                        |
| <i>Nepenthes mirabilis</i>       | Nepenthaceae  | Leaves       | Methanol           | 100 ± 6                        | n.d.                                | 121 ± 7                         | 97 ± 3                          |
|                                  |               |              | Chloroform         | 34 ± 8                         | 22.4 ± 4.0                          | 91 ± 17                         | 94 ± 1                          |
|                                  |               | Stems        | Methanol           | 78 ± 2                         | n.d.                                | 105 ± 14                        | 71 ± 4                          |
| Chloroform                       | 44 ± 1        |              | 26.7 ± 0.1         | 118 ± 24                       | 104 ± 5                             |                                 |                                 |
| <i>Alstonia scholaris</i>        | Apocynaceae   | Leaves       | Methanol           | 78 ± 1                         | n.d.                                | 94 ± 10                         | 86 ± 2                          |
|                                  |               |              | Chloroform         | 25 ± 8                         | 13.0 ± 4.2                          | 147 ± 39                        | 130 ± 64                        |
|                                  |               | Bark         | Methanol           | 92 ± 4                         | n.d.                                | 104 ± 7                         | 88 ± 2                          |
|                                  |               |              | Chloroform         | 56 ± 1                         | n.d.                                | 156 ± 101                       | 143 ± 55                        |
| <i>Phyllanthus reticulatus</i>   | Euphorbiaceae | Leaves       | Methanol           | 96 ± 4                         | n.d.                                | 83 ± 21                         | 80 ± 7                          |
|                                  |               |              | Chloroform         | 40 ± 11                        | 23.2 ± 7.9                          | 111 ± 9                         | 101 ± 6                         |
|                                  |               | Bark         | Methanol           | 102 ± 9                        | n.d.                                | 88 ± 17                         | 79 ± 8                          |
|                                  |               |              | Chloroform         | 18 ± 6                         | 19.1 ± 1.3                          | 172 ± 23                        | 108 ± 20                        |
|                                  |               |              | Methanol           | 102 ± 14                       | n.d.                                | 88 ± 18                         | 84 ± 4                          |

Chloroform

| Latin plant name              | Plant family     | Plant organ    | Extraction solvent | 5-LOX at 30 µg/mL <sup>a</sup> | 5-LOX IC <sub>50</sub> <sup>b</sup> | 15-LOX at 30 µg/mL <sup>a</sup> | 12-LOX at 30 µg/mL <sup>a</sup> |
|-------------------------------|------------------|----------------|--------------------|--------------------------------|-------------------------------------|---------------------------------|---------------------------------|
| <i>Kopsia cochinchinensis</i> | Apocynaceae      | Pleaves        | Methanol           | 32 ± 11                        | 18.0 ± 6.4                          | 159 ± 22                        | 125 ± 23                        |
|                               |                  |                | Chloroform         | 84 ± 5                         | n.d.                                | 93 ± 20                         | 82 ± 11                         |
|                               |                  | Bark           | Chloroform         | 97 ± 3                         | n.d.                                | 89 ± 12                         | 83 ± 8                          |
|                               |                  |                | Methanol           | 83 ± 3                         | n.d.                                | 93 ± 3                          | 102 ± 21                        |
| <i>Ficus benghalensis</i>     | Moraceae         | Leaves         | Chloroform         | 23 ± 11                        | 19.3 ± 2.8                          | 130 ± 63                        | 94 ± 28                         |
|                               |                  |                | Methanol           | 76 ± 4                         | n.d.                                | 78 ± 21                         | 64 ± 11                         |
| <i>Symplocos annamensis</i>   | Symplocaceae     | Leaves         | Chloroform         | 31 ± 7                         | n.d.                                | 102 ± 14                        | 80 ± 6                          |
|                               |                  |                | Methanol           | 86 ± 8                         | n.d.                                | 96 ± 1                          | 84 ± 0                          |
| <i>Croton</i> sp.             | Euphorbiaceae    | Leaves         | Chloroform         | 7 ± 2                          | 15.9 ± 2.1                          | 88 ± 30                         | 94 ± 26                         |
|                               |                  |                | Methanol           | 10 ± 3                         | 9.9 ± 4.6                           | 55 ± 2                          | 75 ± 7                          |
| <i>Stephania venosa</i>       | Menispermaceae   | Roots          | Chloroform         | 16 ± 6                         | 11.2 ± 5.8                          | 126 ± 4                         | 74 ± 9                          |
|                               |                  |                | Methanol           | 86 ± 3                         | n.d.                                | 85 ± 12                         | 84 ± 12                         |
| <i>Streptocaulon juvenas</i>  | Asclepiadaceae   | Roots          | Chloroform         | 65 ± 16                        | n.d.                                | 82 ± 4                          | 84 ± 1                          |
|                               |                  |                | Methanol           | 92 ± 7                         | n.d.                                | 91.4 ± 5                        | 87 ± 3                          |
|                               |                  | Stems + Leaves | Chloroform         | 36 ± 9                         | 8.8 ± 8.8                           | 169 ± 33                        | 144 ± 19                        |
|                               |                  |                | Methanol           | 87 ± 1                         | n.d.                                | 113 ± 13                        | 97 ± 2                          |
| <i>Plumeria rubra</i>         | Apocynaceae      | Bark           | Chloroform         | 61 ± 7                         | n.d.                                | 75 ± 14                         | 67 ± 17                         |
|                               |                  |                | Methanol           | 95 ± 5                         | n.d.                                | 102 ± 9                         | 96 ± 1                          |
| <i>Tinospora crispa</i>       | Menispermaceae   | Stems          | Chloroform         | 28 ± 5                         | 22.5 ± 1.4                          | 66 ± 12                         | 58 ± 8                          |
|                               |                  |                | Methanol           | 77 ± 2                         | n.d.                                | 79 ± 14                         | 74 ± 14                         |
| <i>Stephania cambodica</i>    | Menispermaceae   | Tuber          | Chloroform         | 3 ± 3                          | 10.6 ± 4.1                          | 126 ± 19                        | 81 ± 8                          |
|                               |                  |                | Methanol           | 67 ± 11                        | n.d.                                | 100 ± 9                         | 81 ± 6                          |
| <i>Stephania pierrei</i>      | Menispermaceae   | Tuber          | Chloroform         | 43 ± 6                         | 26.2 ± 3.5                          | 84 ± 8                          | 71 ± 11                         |
|                               |                  |                | Methanol           | 94 ± 9                         | n.d.                                | 94 ± 7                          | 88 ± 7                          |
| <i>Adenium</i> sp.            | Apocynaceae      | Bark           | Chloroform         | 61 ± 8                         | n.d.                                | 76 ± 4                          | 74 ± 8                          |
|                               |                  |                | Methanol           | 101 ± 6                        | n.d.                                | 83 ± 5                          | 87 ± 3                          |
| <i>Aristolochia</i> sp.       | Aristolochiaceae | Stems          | Chloroform         | 7 ± 1                          | 19.4 ± 2.1                          | 25 ± 1                          | 78 ± 13                         |
|                               |                  |                | Methanol           | 97 ± 2                         | n.d.                                | 94 ± 24                         | 96 ± 5                          |
| <i>Hydnophytum formicarum</i> | Rubiaceae        | Tuber          | Chloroform         | 66 ± 6                         | n.d.                                | 80 ± 1                          | 104 ± 11                        |
|                               |                  |                | Methanol           | 79 ± 2                         | n.d.                                | 71 ± 0                          | 63 ± 1                          |
| <i>Parameria laevigata</i>    | Apocynaceae      | Stems + Leaves | Chloroform         | 50 ± 1                         | n.d.                                | 111 ± 5                         | 119 ± 1                         |
|                               |                  |                | Methanol           | 98 ± 1                         | n.d.                                | 79 ± 7                          | 100 ± 8                         |

The extract library for screening was created in the course of the project 'Drugs from nature targeting inflammation (DNTI)<sup>31</sup>. Extracts were prepared according to the protocol of Thi Tran et al.<sup>32</sup>, which we slightly modified by exchanging dichloromethane by chloroform. <sup>a</sup>5-LOX product formation at 30 µg/mL (% control) and <sup>b</sup>IC<sub>50</sub> values (µg/mL) are given as mean ± SEM; *n* = 2–5. <sup>c</sup>Not determined.

**Table S2** Docking results overview: ChemPLP fitness score and hydrogen bond interactions with protein residues from the binding site for the best ranked pose of each compound.

| Compd.     | Stereochemistry                | IC <sub>50</sub> (5-LOX) [ $\mu$ mol/L] <sup>a</sup> | Score | R68 | R101 | E108 | V110 | H125 | I126 | Q129 | H130 | E134 | E136 | T137 | R138 | K140 | Q141 | D166 |
|------------|--------------------------------|------------------------------------------------------|-------|-----|------|------|------|------|------|------|------|------|------|------|------|------|------|------|
| <b>1a</b>  | 2 <i>R</i> , $\gamma$ <i>S</i> | 0.70                                                 | 64.83 |     |      |      | X    |      |      |      |      |      |      |      |      | X    |      |      |
| <b>1b</b>  | 2 <i>S</i> , $\gamma$ <i>R</i> | 0.70                                                 | 72.62 |     |      |      | X    |      |      |      | X    |      | X    |      |      | X    |      |      |
| <b>2a</b>  | 2 <i>R</i> , $\gamma$ <i>R</i> | 1.50                                                 | 71.83 |     |      | X    |      | X    |      |      |      | X    |      |      |      |      |      |      |
| <b>2b</b>  | 2 <i>S</i> , $\gamma$ <i>S</i> | 0.50                                                 | 70.75 |     | X    |      |      |      |      |      |      |      | X    |      |      | X    |      |      |
| <b>3a</b>  | 2 <i>R</i> , $\gamma$ <i>R</i> |                                                      | 72.51 |     |      | X    |      |      |      |      |      |      | X    |      |      |      |      |      |
| <b>3b</b>  | 2 <i>S</i> , $\gamma$ <i>R</i> |                                                      | 71.07 |     |      | X    |      |      |      |      |      |      | X    |      |      |      |      |      |
| <b>3c</b>  | 2 <i>R</i> , $\gamma$ <i>S</i> | 0.80                                                 | 73.48 |     |      |      |      |      | X    |      |      |      |      |      |      | X    |      | X    |
| <b>3d</b>  | 2 <i>S</i> , $\gamma$ <i>S</i> |                                                      | 71.33 |     |      |      |      |      | X    |      |      |      |      |      |      | X    |      |      |
| <b>4a</b>  | 2 <i>R</i> , $\gamma$ <i>R</i> |                                                      | 69.23 |     |      |      |      |      |      | X    |      |      | X    |      |      | X    |      |      |
| <b>4b</b>  | 2 <i>S</i> , $\gamma$ <i>R</i> | 0.46                                                 | 63.83 |     |      |      |      | X    |      |      |      | X    |      |      |      |      | X    |      |
| <b>4c</b>  | 2 <i>R</i> , $\gamma$ <i>S</i> |                                                      | 59.89 |     |      |      |      |      |      |      |      |      | X    |      |      |      |      |      |
| <b>4d</b>  | 2 <i>S</i> , $\gamma$ <i>S</i> |                                                      | 66.46 |     |      |      | X    | X    |      |      | X    | X    |      | X    |      |      |      |      |
| <b>5a</b>  | <i>S</i>                       | 0.51                                                 | 73.76 |     |      |      |      |      |      |      |      |      | X    |      |      | X    |      |      |
| <b>5b</b>  | <i>R</i>                       |                                                      | 76.62 |     |      |      |      |      |      |      |      |      |      | X    |      |      |      |      |
| <b>6a</b>  | <i>S</i>                       |                                                      | 74.01 |     |      |      |      |      |      |      |      | X    | X    |      |      | X    |      |      |
| <b>6b</b>  | <i>R</i>                       | 0.85                                                 | 84.61 |     |      |      |      |      |      |      |      |      |      |      |      |      |      | X    |
| <b>7a</b>  | <i>S</i>                       | 0.59                                                 | 78.89 | X   |      | X    |      |      |      |      |      | X    |      |      |      |      |      | X    |
| <b>7b</b>  | <i>R</i>                       |                                                      | 76.71 |     |      |      |      |      |      |      |      | X    |      |      |      |      |      |      |
| <b>8a</b>  | <i>R</i>                       | >10                                                  | 54.77 | X   |      |      | X    |      |      |      |      |      |      |      |      |      |      |      |
| <b>8b</b>  | <i>S</i>                       |                                                      | 53.12 | X   |      |      |      |      |      |      |      |      |      |      | X    |      |      |      |
| <b>9a</b>  | <i>R</i>                       | 5.70                                                 | 53.43 |     |      |      |      |      |      |      |      |      |      | X    |      |      |      | X    |
| <b>9b</b>  | <i>S</i>                       |                                                      | 52.84 |     |      |      |      |      |      |      |      |      |      |      |      |      |      |      |
| <b>10</b>  | <i>S</i>                       | >10                                                  | 58.52 |     |      |      |      |      |      |      | X    |      |      |      | X    |      |      | X    |
| <b>11a</b> | <i>R</i>                       | >10                                                  | 56.10 |     |      |      |      |      |      |      | X    |      |      | X    | X    |      |      |      |
| <b>11b</b> | <i>S</i>                       |                                                      | 53.42 |     |      |      |      |      | X    |      |      | X    |      |      |      |      |      |      |
| <b>12</b>  |                                | 5.01                                                 | 56.02 |     |      |      |      |      |      |      | X    |      |      |      | X    |      |      |      |
| <b>13</b>  |                                | >10                                                  | 60.02 | X   |      |      |      |      |      |      |      | X    |      | X    |      |      |      |      |
| <b>14</b>  |                                | 8.90                                                 | 55.51 |     |      |      |      |      | X    |      |      | X    |      | X    |      |      |      |      |
| <b>15</b>  |                                | 6.50                                                 | 56.49 | X   | X    |      |      |      |      |      |      |      |      |      | X    |      |      |      |
| <b>16</b>  |                                | 4.39                                                 | 61.18 |     |      |      |      |      |      |      |      |      |      | X    |      |      |      |      |
| <b>17</b>  |                                | 7.18                                                 | 56.02 |     |      |      | X    |      |      |      |      | X    |      | X    |      |      |      |      |
| <b>18</b>  |                                | n.i.                                                 | 35.02 |     |      |      |      |      |      |      |      |      |      |      |      |      |      |      |

<sup>a</sup>IC<sub>50</sub> values inhibition of human recombinant 5-LOX

n.i. = no inhibition

**Table S3** Effect of compound **2** on the lipid mediator profile of A23187-activated human blood.

| Lipid mediators | Vehicle                  | Compound <b>2</b>        |                        |                        |                         |                         |                  |
|-----------------|--------------------------|--------------------------|------------------------|------------------------|-------------------------|-------------------------|------------------|
|                 |                          | (0.3 $\mu\text{mol/L}$ ) | (1 $\mu\text{mol/L}$ ) | (3 $\mu\text{mol/L}$ ) | (10 $\mu\text{mol/L}$ ) | (30 $\mu\text{mol/L}$ ) |                  |
| 5-LOX           | 20-OH-LTB <sub>4</sub>   | 488 ± 245                | 457 ± 196              | 429 ± 187              | 266 ± 79                | 147 ± 75                | 3 ± 3            |
|                 | LTB <sub>4</sub> isomers | 354 ± 166                | 297 ± 112              | 258 ± 81               | 197 ± 89                | 107 ± 67                | n.d.             |
|                 | LTB <sub>4</sub>         | 2,494 ± 1,365            | 2,080 ± 1,024          | 2,060 ± 1,030          | 1,278 ± 377             | 675 ± 346               | 13 ± 13          |
|                 | 5S,6R-diHETE             | 76 ± 34                  | 77 ± 32                | 70 ± 31                | 45 ± 13                 | 21 ± 11                 | n.d.             |
|                 | 5-HETE                   | 4,242 ± 2,206            | 3,882 ± 1,765          | 4,402 ± 1,859          | 2,516 ± 613             | 1,184 ± 484             | 294 ± 178        |
|                 | 5-HEPE                   | 100 ± 39                 | 94 ± 24                | 107 ± 27               | 63 ± 28                 | 35 ± 17                 | 6 ± 4            |
| COX             | PGE <sub>2</sub>         | 30 ± 6                   | 23 ± 4                 | 26 ± 3                 | 29 ± 8                  | 26 ± 6                  | 30 ± 8           |
|                 | PGD <sub>2</sub>         | 6 ± 4                    | 5 ± 2                  | 5 ± 1                  | 3 ± 2                   | 4 ± 2                   | 8 ± 6            |
|                 | TXB <sub>2</sub>         | 789 ± 319                | 587 ± 159              | 527 ± 128              | 561 ± 51                | 767 ± 254               | 894 ± 330        |
| 12/15-LOX       | 15-HETE                  | 268 ± 135                | 163 ± 51               | 191 ± 44               | 190 ± 44                | 397 ± 192               | 563 ± 335        |
|                 | 14-HDHA                  | 606 ± 195                | 529 ± 103              | 583 ± 73               | 549 ± 118               | 560 ± 142               | 793 ± 223        |
|                 | 12-HETE                  | 8,758 ± 4,186            | 6,513 ± 2,504          | 6,711 ± 1,707          | 4,388 ± 555             | 7,535 ± 2,544           | 9,761 ± 3,175    |
|                 | 12-HEPE                  | 170 ± 56                 | 146 ± 42               | 152 ± 18               | 110 ± 11                | 168 ± 48                | 231 ± 65         |
|                 | 4-HDHA                   | 36 ± 13                  | 26 ± 8                 | 24 ± 6                 | 49 ± 26                 | 65 ± 32                 | 93 ± 48          |
| Fatty acids     | AA                       | 92,406 ± 13,862          | 87,940 ± 9,780         | 950,120 ± 10,076       | 86,695 ± 4,318          | 104,828 ± 16,859        | 110,693 ± 12,200 |
|                 | EPA                      | 76,133 ± 18,205          | 76,745 ± 21,976        | 67,997 ± 12,100        | 69,601 ± 18,071         | 74,569 ± 16,264         | 73,498 ± 18,021  |
|                 | DHA                      | 123,473 ± 35,237         | 123,537 ± 26,295       | 126,757 ± 31,681       | 120,295 ± 23,681        | 111,856 ± 34,923        | 114,093 ± 38,410 |

  

| Lipid mediators | Compound <b>5</b>        |                        |                        |                         |                         |                         | Zileuton<br>(3 $\mu\text{mol/L}$ ) |
|-----------------|--------------------------|------------------------|------------------------|-------------------------|-------------------------|-------------------------|------------------------------------|
|                 | (0.3 $\mu\text{mol/L}$ ) | (1 $\mu\text{mol/L}$ ) | (3 $\mu\text{mol/L}$ ) | (10 $\mu\text{mol/L}$ ) | (30 $\mu\text{mol/L}$ ) | (30 $\mu\text{mol/L}$ ) |                                    |
| 5-LOX           | 20-OH-LTB <sub>4</sub>   | 488 ± 175              | 566 ± 227              | 824 ± 253               | 579 ± 264               | 455 ± 191               | 236 ± 96                           |
|                 | LTB <sub>4</sub> isomers | 349 ± 137              | 337 ± 120              | 546 ± 164               | 374 ± 147               | 327 ± 156               | 115 ± 41                           |
|                 | LTB <sub>4</sub>         | 2,251 ± 908            | 2,602 ± 1,028          | 3,807 ± 1,281           | 2,650 ± 1,299           | 2,322 ± 987             | 1,167 ± 577                        |
|                 | 5S,6R-diHETE             | 92 ± 37                | 100 ± 36               | 141 ± 41                | 101 ± 49                | 80 ± 34                 | 37 ± 20                            |
|                 | 5-HETE                   | 4,183 ± 1,884          | 4,879 ± 2,027          | 6,669 ± 2,182           | 4,818 ± 2,404           | 4,067 ± 1,848           | 1,995 ± 1,061                      |
|                 | 5-HEPE                   | 110 ± 33               | 131 ± 44               | 181 ± 50                | 124 ± 42                | 113 ± 40                | 36 ± 14                            |
| COX             | PGE <sub>2</sub>         | 35 ± 8                 | 39 ± 8                 | 59 ± 18                 | 44 ± 14                 | 38 ± 8                  | 20 ± 7                             |
|                 | PGD <sub>2</sub>         | 4 ± 4                  | 9 ± 5                  | 6 ± 6                   | 4 ± 4                   | 4 ± 4                   | 7 ± 7                              |
|                 | TXB <sub>2</sub>         | 763 ± 239              | 984 ± 397              | 1,326 ± 482             | 1,013 ± 349             | 1033 ± 383              | 746 ± 381                          |
| 12/15-LOX       | 15-HETE                  | 223 ± 52               | 253 ± 69               | 358 ± 134               | 277 ± 100               | 290 ± 104               | 228 ± 90                           |
|                 | 14-HDHA                  | 660 ± 170              | 715 ± 180              | 957 ± 256               | 722 ± 188               | 765 ± 203               | 564 ± 88                           |
|                 | 12-HETE                  | 8,612 ± 3,356          | 10,090 ± 4,141         | 12,256 ± 4,292          | 10,300 ± 4,315          | 10,136 ± 4371           | 8,473 ± 2,992                      |
|                 | 12-HEPE                  | 220 ± 77               | 227 ± 78               | 280 ± 79                | 215 ± 72                | 227 ± 62                | 172 ± 27                           |
|                 | 4-HDHA                   | 31 ± 8                 | 29 ± 4                 | 38 ± 10                 | 27 ± 3                  | 38 ± 7                  | 34 ± 6                             |
| Fatty acids     | AA                       | 94,274 ± 10,609        | 100,106 ± 9,134        | 123,060 ± 20,518        | 101,992 ± 15,387        | 104,855 ± 14,743        | 97,858 ± 12,853                    |
|                 | EPA                      | 62,981 ± 14,241        | 69,825 ± 17,109        | 90,022 ± 27,223         | 72,466 ± 14,014         | 74,508 ± 12,972         | 72,089 ± 19,021                    |
|                 | DHA                      | 126,572 ± 36,366       | 116,962 ± 33,564       | 159,216 ± 79,635        | 129,069 ± 46,762        | 132,497 ± 38,354        | 127,202 ± 32,533                   |

Concentrations of lipid mediators analyzed by UPLC-MS/MS are given in pg/mL blood as mean ± SEM,  $n = 3$ , n.d., not detectable ( $< 0.5$  pg). 20-OH-LTB<sub>4</sub>, 20-hydroxy-LTB<sub>4</sub>; HEPE, hydroxy-eicosapentaenoic acid; (di)HETE, (di)hydroxy-eicosatetraenoic acid; HDHA, hydroxy-docosahexaenoic acid; AA, arachidonic acid; EPA, eicosapentaenoic acid; DHA, docosahexaenoic acid.

**Table S4** Effect of compound **2** on the lipid mediator profile of *E. coli*-stimulated human blood.

|             | Lipid mediators                     | Vehicle              | Compound <b>2</b><br>(0.3 $\mu\text{mol/L}$ ) | Compound <b>2</b><br>(3 $\mu\text{mol/L}$ ) | Compound <b>2</b><br>(30 $\mu\text{mol/L}$ ) | Zileuton<br>(3 $\mu\text{mol/L}$ ) |
|-------------|-------------------------------------|----------------------|-----------------------------------------------|---------------------------------------------|----------------------------------------------|------------------------------------|
| 5-LOX       | 5-HEPE                              | 116 $\pm$ 35         | 105 $\pm$ 32                                  | 91 $\pm$ 25                                 | 40 $\pm$ 8                                   | 42 $\pm$ 14                        |
|             | 5-HETE                              | 2,659 $\pm$ 685      | 2,601 $\pm$ 584                               | 2,217 $\pm$ 435                             | 661 $\pm$ 190                                | 515 $\pm$ 130                      |
|             | LTB <sub>4</sub> isomers            | 546 $\pm$ 248        | 424 $\pm$ 95                                  | 361 $\pm$ 89                                | 127 $\pm$ 44                                 | 54 $\pm$ 10                        |
|             | LTB <sub>4</sub>                    | 6,313 $\pm$ 2        | 5,560 $\pm$ 2,084                             | 4,499 $\pm$ 1697                            | 560 $\pm$ 366                                | 207 $\pm$ 164                      |
|             | 5S,6R-diHETE                        | 98 $\pm$ 33          | 97 $\pm$ 36                                   | 79 $\pm$ 26                                 | 16 $\pm$ 6                                   | 9 $\pm$ 3                          |
| COX         | PGE <sub>2</sub>                    | 877 $\pm$ 408        | 952 $\pm$ 476                                 | 887 $\pm$ 418                               | 1 $\pm$ 472                                  | 706 $\pm$ 395                      |
|             | PGD <sub>2</sub>                    | 120 $\pm$ 56         | 135 $\pm$ 64                                  | 126 $\pm$ 55                                | 162 $\pm$ 76                                 | 134 $\pm$ 90                       |
|             | PGF <sub>2<math>\alpha</math></sub> | 600 $\pm$ 289        | 596 $\pm$ 279                                 | 602 $\pm$ 294                               | 739 $\pm$ 363                                | 630 $\pm$ 423                      |
|             | TXB <sub>2</sub>                    | 27,680 $\pm$ 13,136  | 26,424 $\pm$ 13,955                           | 30,649 $\pm$ 15,827                         | 25,354 $\pm$ 13,039                          | 24,692 $\pm$ 13,119                |
| 12/15-LOX   | 17-HDHA                             | 717 $\pm$ 203        | 698 $\pm$ 217                                 | 768 $\pm$ 214                               | 598 $\pm$ 167                                | 229 $\pm$ 22                       |
|             | 14-HDHA                             | 9,190 $\pm$ 3,131    | 8,912 $\pm$ 3,173                             | 9,077 $\pm$ 3,105                           | 8030 $\pm$ 2834                              | 1,542 $\pm$ 366                    |
|             | 15-HEPE                             | 172 $\pm$ 62         | 169 $\pm$ 71                                  | 164 $\pm$ 61                                | 153 $\pm$ 57                                 | 65 $\pm$ 20                        |
|             | 12-HEPE                             | 2,913 $\pm$ 1,180    | 2,799 $\pm$ 1,403                             | 2,807 $\pm$ 1,291                           | 2,897 $\pm$ 1,324                            | 897 $\pm$ 388                      |
|             | 15-HETE                             | 3,750 $\pm$ 790      | 3,694 $\pm$ 881                               | 3,762 $\pm$ 734                             | 3,436 $\pm$ 764                              | 1,765 $\pm$ 353                    |
|             | 12-HETE                             | 31,609 $\pm$ 3,850   | 29,623 $\pm$ 5,025                            | 32,978 $\pm$ 4,717                          | 28,654 $\pm$ 2,841                           | 20,173 $\pm$ 4417                  |
|             | 7-HDHA                              | 39 $\pm$ 15          | 41 $\pm$ 14                                   | 44 $\pm$ 16                                 | 33 $\pm$ 15                                  | 27 $\pm$ 10                        |
|             | 4-HDHA                              | 63 $\pm$ 31          | 86 $\pm$ 35                                   | 79 $\pm$ 32                                 | 64 $\pm$ 35                                  | 76 $\pm$ 26                        |
| SPM         | 5,15 di-HETE                        | 69 $\pm$ 13          | 64 $\pm$ 10                                   | 67 $\pm$ 10                                 | 42 $\pm$ 9                                   | 20 $\pm$ 2                         |
|             | RvD5                                | 6 $\pm$ 2            | 8 $\pm$ 2                                     | 7 $\pm$ 1                                   | 6 $\pm$ 2                                    | 2 $\pm$ 0                          |
| Fatty acids | RvE3                                | 34 $\pm$ 23          | 38 $\pm$ 0                                    | 39 $\pm$ 1                                  | 44 $\pm$ 31                                  | 20 $\pm$ 6                         |
|             | AA                                  | 424,337 $\pm$ 52,820 | 513,640 $\pm$ 51,167                          | 340,083 $\pm$ 54,832                        | 397,935 $\pm$ 23,643                         | 529,704 $\pm$ 85,597               |
|             | EPA                                 | 68,231 $\pm$ 20,988  | 75,093 $\pm$ 16,682                           | 53,637 $\pm$ 13,559                         | 50,745 $\pm$ 5,157                           | 67,085 $\pm$ 10,737                |
|             | DHA                                 | 31,698 $\pm$ 5,323   | 38,698 $\pm$ 3,521                            | 23,775 $\pm$ 2,860                          | 31,706 $\pm$ 4,176                           | 45,337 $\pm$ 11,464                |

Concentrations of lipid mediators analyzed by UPLC–MS/MS are given in pg/mL blood as mean  $\pm$  SEM,  $n = 4$ . HEPE, hydroxy-eicosapentaenoic acid; (di)HETE, (di)hydroxy-eicosatetraenoic acid; HDHA, hydroxy-docosahexaenoic acid; AA, arachidonic acid; EPA, eicosapentaenoic acid; DHA, docosahexaenoic acid.

**Table S5** Effect of compound **2** on the lipid mediator profile of *E. coli*-stimulated M1 and M2 macrophages.

|             | Lipid mediators                     | M1                 | Compound <b>2</b>   | Compound <b>2</b>   | M2                  | Compound <b>2</b>   | Compound <b>2</b>   |
|-------------|-------------------------------------|--------------------|---------------------|---------------------|---------------------|---------------------|---------------------|
|             |                                     | vehicle            | (0,3 $\mu$ mol/L)   | (3 $\mu$ mol/L)     | vehicle             | (0,3 $\mu$ mol/L)   | (3 $\mu$ mol/L)     |
| 5-LOX       | 5-HEPE                              | 11 $\pm$ 4         | 5 $\pm$ 3           | 2 $\pm$ 1           | 103 $\pm$ 65        | 46 $\pm$ 13         | 20 $\pm$ 5          |
|             | 5-HETE                              | 36 $\pm$ 16        | 17 $\pm$ 7          | 10 $\pm$ 2          | 658 $\pm$ 449       | 282 $\pm$ 124       | 132 $\pm$ 44        |
|             | LTB <sub>4</sub> isomers            | 8 $\pm$ 2          | 3 $\pm$ 1           | 2 $\pm$ 0           | 55 $\pm$ 31         | 25 $\pm$ 9          | 20 $\pm$ 10         |
|             | LTB <sub>4</sub>                    | 19 $\pm$ 3         | 16 $\pm$ 6          | 3 $\pm$ 0           | 58 $\pm$ 37         | 29 $\pm$ 13         | 21 $\pm$ 8          |
|             | 5S,6R-diHETE                        | 5 $\pm$ 1          | 3 $\pm$ 1           | 2 $\pm$ 1           | 41 $\pm$ 35         | 11 $\pm$ 7          | 4 $\pm$ 1           |
| COX         | PGE <sub>2</sub>                    | 2,334 $\pm$ 888    | 2,268 $\pm$ 842     | 1,785 $\pm$ 558     | 185 $\pm$ 70        | 219 $\pm$ 82        | 488 $\pm$ 172       |
|             | PGD <sub>2</sub>                    | 24 $\pm$ 6         | 20 $\pm$ 5          | 26 $\pm$ 5          | 64 $\pm$ 28         | 70 $\pm$ 28         | 128 $\pm$ 52        |
|             | PGF <sub>2<math>\alpha</math></sub> | 263 $\pm$ 115      | 227 $\pm$ 89        | 191 $\pm$ 43        | 145 $\pm$ 58        | 165 $\pm$ 66        | 210 $\pm$ 80        |
|             | TXB <sub>2</sub>                    | 2,799 $\pm$ 440    | 2,503 $\pm$ 366     | 2,821 $\pm$ 503     | 16,293 $\pm$ 7,141  | 16,040 $\pm$ 6,659  | 11,502 $\pm$ 4,470  |
| 12/15-LOX   | 17-HDHA                             | 19 $\pm$ 2         | 20 $\pm$ 1          | 30 $\pm$ 1          | 1,038 $\pm$ 879     | 2,982 $\pm$ 2,032   | 4,691 $\pm$ 1,694   |
|             | 14-HDHA                             | 8 $\pm$ 4          | 7 $\pm$ 3           | 16 $\pm$ 9          | 200 $\pm$ 164       | 752 $\pm$ 468       | 1,470 $\pm$ 374     |
|             | 15-HEPE                             | 4 $\pm$ 0          | 6 $\pm$ 1           | 10 $\pm$ 2          | 520 $\pm$ 450       | 1,463 $\pm$ 852     | 2,349 $\pm$ 999     |
|             | 12-HEPE                             | 4 $\pm$ 2          | 5 $\pm$ 3           | 5 $\pm$ 2           | 89 $\pm$ 76         | 249 $\pm$ 159       | 311 $\pm$ 142       |
|             | 15-HETE                             | 68 $\pm$ 10        | 87 $\pm$ 7          | 114 $\pm$ 9         | 4,459 $\pm$ 3,702   | 11,836 $\pm$ 6,790  | 22,589 $\pm$ 10,571 |
|             | 12-HETE                             | 24 $\pm$ 8         | 29 $\pm$ 9          | 31 $\pm$ 9          | 350 $\pm$ 299       | 777 $\pm$ 459       | 1,373 $\pm$ 670     |
|             | 7-HDHA                              | 7 $\pm$ 1          | 4 $\pm$ 2           | 6 $\pm$ 1           | 72 $\pm$ 45         | 123 $\pm$ 71        | 125 $\pm$ 35        |
|             | 4-HDHA                              | 7 $\pm$ 4          | 6 $\pm$ 3           | 7 $\pm$ 3           | 19 $\pm$ 5          | 20 $\pm$ 6          | 19 $\pm$ 5          |
|             | 5,15-diHETE                         | 31 $\pm$ 18        | 43 $\pm$ 7          | 9 $\pm$ 5           | 197 $\pm$ 140       | 388 $\pm$ 262       | 500 $\pm$ 344       |
| SPM         | PD1                                 | n.d.               | n.d.                | n.d.                | 13 $\pm$ 11         | 42 $\pm$ 37         | 61 $\pm$ 40         |
|             | AT-PD1                              | n.d.               | n.d.                | n.d.                | 18 $\pm$ 16         | 55 $\pm$ 49         | 73 $\pm$ 46         |
|             | PDX                                 | n.d.               | n.d.                | n.d.                | 2 $\pm$ 1           | 7 $\pm$ 5           | 14 $\pm$ 5          |
|             | RvD5                                | n.d.               | n.d.                | n.d.                | 159 $\pm$ 149       | 488 $\pm$ 414       | 598 $\pm$ 414       |
|             | MaR1                                | 1 $\pm$ 0          | n.d.                | 1 $\pm$ 0           | 6 $\pm$ 5           | 31 $\pm$ 22         | 58 $\pm$ 23         |
|             | RvE3                                | 18 $\pm$ 1         | 16 $\pm$ 2          | 17 $\pm$ 1          | 28 $\pm$ 7          | 40 $\pm$ 18         | 74 $\pm$ 43         |
| Fatty acids | AA                                  | 10,197 $\pm$ 3,150 | 32,298 $\pm$ 27,652 | 34,503 $\pm$ 28,783 | 79,482 $\pm$ 33,388 | 64,172 $\pm$ 23,650 | 67,772 $\pm$ 28,023 |
|             | EPA                                 | 1,759 $\pm$ 506    | 4,979 $\pm$ 4,344   | 5,045 $\pm$ 4,291   | 16,231 $\pm$ 8,294  | 16,134 $\pm$ 7,468  | 11,801 $\pm$ 5,294  |
|             | DHA                                 | 2,197 $\pm$ 625    | 6,497 $\pm$ 5,152   | 7,482 $\pm$ 6,001   | 19,427 $\pm$ 14,305 | 19,499 $\pm$ 14,221 | 15,678 $\pm$ 10,296 |

Concentrations of lipid mediators analyzed by UPLC–MS/MS are given in pg/2 $\times$ 10<sup>6</sup> cells as mean  $\pm$  SEM,  $n = 3$ , n.d., not detectable (< 0.5 pg). HEPE, hydroxy-eicosapentaenoic acid; (di)HETE, (di)hydroxy-eicosatetraenoic acid; HDHA, hydroxy-docosahexaenoic acid; AA, arachidonic acid; EPA, eicosapentaenoic acid; DHA, docosahexaenoic acid.



**Table S6** Effect of compound **2** on the lipid mediator profile of *S. aureus*-stimulated M1 and M2 macrophages.

|             | Lipid mediators                     | M1                   | Compound 2           | Compound 2           | M2                   | Compound 2           | Compound 2           |
|-------------|-------------------------------------|----------------------|----------------------|----------------------|----------------------|----------------------|----------------------|
|             |                                     | vehicle              | (0,3 $\mu$ mol/L)    | (3 $\mu$ mol/L)      | vehicle              | (0,3 $\mu$ mol/L)    | (3 $\mu$ mol/L)      |
| 5-LOX       | 5-HEPE                              | 452 $\pm$ 96         | 193 $\pm$ 51         | 94 $\pm$ 8           | 515 $\pm$ 308        | 406 $\pm$ 181        | 179 $\pm$ 44         |
|             | 5-HETE                              | 3,835 $\pm$ 958      | 1,486 $\pm$ 385      | 333 $\pm$ 57         | 5707 $\pm$ 3607      | 3,570 $\pm$ 1,713    | 2,042 $\pm$ 593      |
|             | LTB <sub>4</sub> isomers            | 355 $\pm$ 105        | 142 $\pm$ 34         | 36 $\pm$ 6           | 664 $\pm$ 374        | 524 $\pm$ 136        | 223 $\pm$ 36         |
|             | LTB <sub>4</sub>                    | 1,206 $\pm$ 316      | 434 $\pm$ 121        | 37 $\pm$ 3           | 1,624 $\pm$ 1,011    | 693 $\pm$ 316        | 301 $\pm$ 89         |
|             | 5S,6R-diHETE                        | 189 $\pm$ 90         | 51 $\pm$ 27          | 8 $\pm$ 2            | 240 $\pm$ 150        | 100 $\pm$ 59         | 42 $\pm$ 17          |
| COX         | PGE <sub>2</sub>                    | 2,718 $\pm$ 648      | 3,925 $\pm$ 908      | 4,055 $\pm$ 944      | 1073 $\pm$ 501       | 1,234 $\pm$ 498      | 2,885 $\pm$ 998      |
|             | PGD <sub>2</sub>                    | 93 $\pm$ 13          | 110 $\pm$ 15         | 186 $\pm$ 28         | 276 $\pm$ 51         | 313 $\pm$ 48         | 677 $\pm$ 110        |
|             | PGF <sub>2<math>\alpha</math></sub> | 1,094 $\pm$ 204      | 1,281 $\pm$ 194      | 1,299 $\pm$ 143      | 655 $\pm$ 261        | 670 $\pm$ 194        | 957 $\pm$ 270        |
|             | TXB <sub>2</sub>                    | 21,837 $\pm$ 1798    | 24,397 $\pm$ 1,753   | 19,163 $\pm$ 2,201   | 48,575 $\pm$ 15,755  | 48,792 $\pm$ 12,973  | 35,246 $\pm$ 9,971   |
| 12/15-LOX   | 17-HDHA                             | 823 $\pm$ 102        | 787 $\pm$ 103        | 1,240 $\pm$ 72       | 25,340 $\pm$ 2,360   | 32,587 $\pm$ 7,358   | 34,486 $\pm$ 7,201   |
|             | 14-HDHA                             | 446 $\pm$ 234        | 393 $\pm$ 167        | 635 $\pm$ 243        | 5,475 $\pm$ 270      | 7,298 $\pm$ 1,444    | 8,674 $\pm$ 1,782    |
|             | 15-HEPE                             | 100 $\pm$ 19         | 112 $\pm$ 2          | 131 $\pm$ 16         | 7,864 $\pm$ 1,632    | 15,578 $\pm$ 4,754   | 10,315 $\pm$ 643     |
|             | 12-HEPE                             | 224 $\pm$ 159        | 162 $\pm$ 50         | 295 $\pm$ 119        | 1,572 $\pm$ 252      | 2,909 $\pm$ 581      | 1,687 $\pm$ 232      |
|             | 15-HETE                             | 1,310 $\pm$ 396      | 1,385 $\pm$ 168      | 1,597 $\pm$ 329      | 70,086 $\pm$ 10,744  | 117,314 $\pm$ 20,290 | 84,506 $\pm$ 5,519   |
|             | 12-HETE                             | 1,412 $\pm$ 1,076    | 2,051 $\pm$ 1,236    | 3,199 $\pm$ 1,547    | 13,557 $\pm$ 2,704   | 18,108 $\pm$ 1,178   | 16,147 $\pm$ 2,646   |
|             | 7-HDHA                              | 239 $\pm$ 59         | 115 $\pm$ 14         | 89 $\pm$ 9           | 513 $\pm$ 80         | 570 $\pm$ 95         | 590 $\pm$ 101        |
|             | 4-HDHA                              | 93 $\pm$ 14          | 92 $\pm$ 16          | 94 $\pm$ 13          | 97 $\pm$ 13          | 80 $\pm$ 19          | 91 $\pm$ 19          |
|             | 5,15-diHETE                         | 246 $\pm$ 150        | 63 $\pm$ 20          | 54 $\pm$ 29          | 6,380 $\pm$ 1,635    | 7,714 $\pm$ 1,478    | 6,847 $\pm$ 1,698    |
| SPM         | PD1                                 | 14 $\pm$ 4           | 14 $\pm$ 1           | 17 $\pm$ 4           | 71 $\pm$ 20          | 114 $\pm$ 66         | 106 $\pm$ 31         |
|             | PDX                                 | 5 $\pm$ 0            | 4 $\pm$ 0            | 4 $\pm$ 1            | 88 $\pm$ 20          | 126 $\pm$ 40         | 166 $\pm$ 41         |
|             | RvD2                                | n.d.                 | n.d.                 | n.d.                 | 49 $\pm$ 19          | 92 $\pm$ 67          | 75 $\pm$ 39          |
|             | RvD5                                | 16 $\pm$ 3           | 9 $\pm$ 2            | 6 $\pm$ 0            | 2 $\pm$ 790          | 2 $\pm$ 1            | 2 $\pm$ 967          |
|             | MaR1                                | 4 $\pm$ 1            | 6 $\pm$ 1            | 2 $\pm$ 1            | 319 $\pm$ 89         | 417 $\pm$ 118        | 444 $\pm$ 146        |
| Fatty acids | AA                                  | 140,934 $\pm$ 25,617 | 121,829 $\pm$ 14,902 | 100,344 $\pm$ 15,784 | 163,429 $\pm$ 56,176 | 155,166 $\pm$ 50,390 | 146,874 $\pm$ 45,143 |
|             | EPA                                 | 41,220 $\pm$ 7,626   | 43,151 $\pm$ 3,527   | 37,748 $\pm$ 7,345   | 52,063 $\pm$ 13,088  | 40,876 $\pm$ 9,447   | 48,845 $\pm$ 10,427  |
|             | DHA                                 | 105,163 $\pm$ 17,328 | 125,609 $\pm$ 10,283 | 97,478 $\pm$ 14,163  | 67,446 $\pm$ 6,404   | 59,757 $\pm$ 2,036   | 62,539 $\pm$ 1,086   |

Concentrations of lipid mediators analyzed by UPLC-MS/MS are given in pg/2 $\times$ 10<sup>6</sup> cells as mean  $\pm$  SEM,  $n = 3$ , n.d., not detectable ( $< 0.5$  pg). The heatmap shows percentage changes upon administration of compound **2** relative to the vehicle control. HEPE, hydroxy-eicosapentaenoic acid; (di)HETE, (di)hydroxy-eicosatetraenoic acid; HDHA, hydroxy-docosahexaenoic acid; AA, arachidonic acid; EPA, eicosapentaenoic acid; DHA, docosahexaenoic acid.
